# Supplementary material
Source: HighWire-hosted journal article supplement (http://www.cmajopen.ca/highwire/filestream/80788/field_highwire_adjunct_files/0/open-2014-0014-1-at.pdf)
Supplement: open-2014-0014-1-at.pdf [file open-2014-0014-1-at.pdf]

Aaron Orkin

[aaron.orkin@mail.utoronto.ca](mailto:aaron.orkin@mail.utoronto.ca)

VIA REGULAR MAIL

July 12, 2013

Susan Bengler  
Freedom of Information Coordinator  
Social Justice Tribunals Ontario  
777 Bay Street, 12<sup>th</sup> Floor  
M5G 2E5

Dear Ms. Bengler:

**Re: Peart v. Ontario (Ministry of Community Safety and Community Services) - HRTO File No. TR-0680-09 - FARMS medical repatriation data marked as Exhibit 8, Tab 141 (amongst the Applicant's documents)**

I am an emergency medical doctor and epidemiologist affiliated with the University of Toronto's Dalla Lana School of Public Health.

I am writing to request access to a general record (i.e. non-personal information) that was marked as an exhibit at the evidentiary portion of the above-noted hearing, which took place at the Human Rights Tribunal of Ontario between April 17 and 26, 2013. During her testimony, Dr. Kerry Preibisch referred to certain FARMS medical repatriation data, which was marked as Exhibit 8, Tab 141.

I would be grateful if you could provide me with a copy of this Exhibit.

If necessary, I do not object to receipt of this raw data in redacted form so as to protect the identities of any workers who were repatriated to their sending countries for medical reasons.

My \$5.00 application fee, addressed to the Minister of Finance, is enclosed. Thank you for considering my request. Should you require any further information, I can be reached at [aaron.orkin@mail.utoronto.ca](mailto:aaron.orkin@mail.utoronto.ca).

Yours truly,

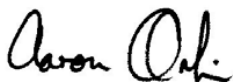

Aaron Orkin MD MSc MPH CCFP  
Dalla Lana School of Public Health

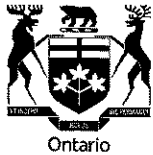

**Social Justice Tribunals Ontario**

*Providing fair and accessible dispute resolution*

777 Bay Street, 12<sup>th</sup> Floor  
Toronto ON M5G 2E5  
Tel: 416-585-7483  
Fax: 416-585-6363

**Tribunaux de justice sociale Ontario**

*Pour une justice accessible et équitable*

Tribunal des droits de la personne de l'Ontario  
777, rue Bay, 12e étage  
Toronto ON M5G 2E5  
Tél.: 416-585-7483  
Télééc.: 416-585-6363

August 2, 2013

Our File Number: R13050

Aaron Orkin  
Dalla Lana School of Public Health  
683 Shaw Street  
Toronto, Ontario  
M6G #L8

Dear Mr. Orkin

Thank you for the cheque for \$54.20 you provided for the fees associated with processing your request under the *Freedom of Information and Protection of Privacy Act* (the Act) for access to the FARMS medical repatriation data that was marked as Exhibit 8, Tab 141 in HRTO file TR-0680-09 (Peart v. Ontario).

I am enclosing a copy of the FARMS medical repatriation data from which I have redacted the personal information of the migrant workers.

You may ask for a review of this decision within 30 days of receiving this letter by writing to: Registrar, Information and Privacy Commissioner/Ontario, 2 Bloor Street East, Suite 1400, Toronto, Ontario, M4W 1A8, Telephone: 416.326.3333 or toll free 1.800.387.0073.

If you decide to request a review of this decision, please provide the Commissioner's office with the following:

- The file number listed at the beginning of this letter;
- A copy of this decision letter;
- A copy of the original request for information you sent to our institution.

In addition, you must send an appeal fee to the Commissioner's office. The appeal fee is \$10.00 for a request for your personal information. Please include the fee with your letter of appeal – appeal fees should be in the form of either a cheque or money order, payable to the Minister of Finance.

Child and Family Services Review Board  
Custody Review Board  
Human Rights Tribunal of Ontario  
Landlord and Tenant Board Ontario  
Special Education (*English*) Tribunal Ontario  
Special Education (*French*) Tribunal Ontario  
Social Benefits Tribunal

Commission de révision des services à l'enfance et à la famille  
Commission de révision des placements sous garde  
Tribunal des droits de la personne de l'Ontario  
Commission de la location immobilière  
Tribunal de l'enfance en difficulté de l'Ontario (*anglais*)  
Tribunal de l'enfance en difficulté de l'Ontario (*français*)  
Tribunal de l'aide sociale

# F.A.R.M.S.

Foreign Agricultural Resource Management Services

5995 Avebury Road, Suite 706  
Mississauga, Ontario L5R 3P9  
Tel (905) 568-4500 Fax (905) 568-4175

## FACSIMILE TRANSMISSION

# OF PAGES INCLUDING COVER PAGE 46.

DATE 20 December 2011

FAX #

TO Mark Edelstein, Weir Foulds LLP (fax 416-365-1876)  
And  
Arif Virani, Ministry of the Attorney General (fax 416-326-4015)

FROM Sue Williams

SUBJECT Peart V. Ontario – HRTO File number: TR-0680-09

As per the Human rights Tribunal of Ontario Interim Decision please find following the entire medical repatriations in the possession of F.A.R.M.S.

Please note: the year 2000 was a transitional year where F.A.R.M.S. data base was re-written and prior to this any system generated medical repatriation information is not available albeit a few manual archived reports are included.

MEDICAL  
REPATRIATION  
REPORT

| LAST NAME | FIRST NAME | WRKS CODE | END DATE | ER. LAST NAME | FIRST NAME |
|-----------|------------|-----------|----------|---------------|------------|
|-----------|------------|-----------|----------|---------------|------------|

MEDICAL REPATRIATION FOR: B

|                                                                                                       |  |  |          |          |      |
|-------------------------------------------------------------------------------------------------------|--|--|----------|----------|------|
| Medical reasons- was not fit to work:- started before came to Canada<br>Unnamed worker<br>Worker paid |  |  | 08/06/93 | SCNEIDER | ERIC |
|-------------------------------------------------------------------------------------------------------|--|--|----------|----------|------|

|  |  |  |          |          |      |
|--|--|--|----------|----------|------|
|  |  |  | 09/13/93 | FEDORKOW | JOHN |
|--|--|--|----------|----------|------|

Worker was sick  
Named worker  
Er. paid

|  |  |  |          |       |          |
|--|--|--|----------|-------|----------|
|  |  |  | 07/18/93 | ABELE | JOHN JR. |
|--|--|--|----------|-------|----------|

MEDICAL REPATRIATION FOR: E

Worker was sick  
Unnamed worker  
Er. paid

|  |  |  |          |           |        |
|--|--|--|----------|-----------|--------|
|  |  |  | 08/14/93 | TILLOTSON | ROBERT |
|--|--|--|----------|-----------|--------|

Worker was sick  
Unnamded worker  
Worker paid

|  |  |  |          |        |         |
|--|--|--|----------|--------|---------|
|  |  |  | 08/08/93 | DELEAN | EUGENIA |
|--|--|--|----------|--------|---------|

Cut finger  
Unnamed worker  
Worker paid

|  |  |  |          |        |        |
|--|--|--|----------|--------|--------|
|  |  |  | 08/28/93 | VILACA | EDWARD |
|--|--|--|----------|--------|--------|

MEDICAL REPATRIATION FOR: J

Heart condition  
Named worker  
Er. paid

|  |  |  |          |       |     |
|--|--|--|----------|-------|-----|
|  |  |  | 07/09/93 | KNOIT | ROD |
|--|--|--|----------|-------|-----|

Worker was sick  
Named worker  
Er. paid

|  |  |  |          |         |        |
|--|--|--|----------|---------|--------|
|  |  |  | 08/19/93 | VAN DEN | JOSEPH |
|--|--|--|----------|---------|--------|

Worker was sick  
Unnamed worker  
Worker paid

|  |  |  |          |        |     |
|--|--|--|----------|--------|-----|
|  |  |  | 09/17/93 | DENBOK | KEN |
|--|--|--|----------|--------|-----|

Broken leg/Named worker/Er. paid

|  |  |  |          |        |      |
|--|--|--|----------|--------|------|
|  |  |  | 09/25/93 | DOBIAS | ALEX |
|--|--|--|----------|--------|------|





\*\*\*\*\*  
 \* MEDICAL \*  
 \* REPATRIATION \*  
 \* REPORT \*  
 \*\*\*\*\*

LAST NAME  
=====

FIRST NAME  
=====

WRKS CODE  
=====

END DATE  
=====

ER. LAST NAME  
=====

FIRST NAME  
=====

MEDICAL REPATRIATION FOR: M

|                                                                      |          |             |           |
|----------------------------------------------------------------------|----------|-------------|-----------|
| Fractured ankle<br>Named worker<br>Er. paid                          | 08/25/93 | HUBER       | WALTER    |
| Mentally ill<br>Unnamed worker<br>Worker paid                        | 08/24/93 | KLOSLER     | GEORGE    |
| Worker was sick<br>Named worker                                      | 06/23/93 | MASTRONARDI | OLLIE     |
| Sore back - existed before started work.<br>Named worker<br>Er. paid | 07/18/93 | FORD        | WESLEY    |
| Child was sick<br>Named worker<br>worker paid                        | 07/14/93 | DICK        | DENNIS J. |
| Bad back<br>Named worker<br>Er. paid                                 | 08/07/93 | HUBER       | WALTER    |
| Throat and ear infection<br>Named worker<br>Worker paid              | 07/17/93 | MESSECAR    | WAYNE     |
|                                                                      | 08/03/93 | KLOSLER     | GEORGE    |
|                                                                      | 08/18/93 | GEGENY      | EMERY     |
| Back problem<br>Unnamed worker<br>Worker paid                        | 09/18/93 | DE COENE    | BRIAN     |
| Worker broke his leg/Named worker/Er. paid                           | 07/31/93 | BRAUN       | FRANK M.  |

\*\*\*\*\*  
♦ MEDICAL ♦  
♦ REPATRIATION ♦  
♦ REPORT ♦  
\*\*\*\*\*

Sent

LAST NAME  
=====

FIRST NAME  
=====

WRKS CODE  
=====

END DATE  
=====

ER. LAST NAME  
=====

FIRST NAME  
=====

MEDICAL REPATRIATION FOR: M

NAMED WORKER  
ER. PAID / WORKER WAS SICK

03/10/93

TIESSEN

WILLIAM

UNNAMED WORKER  
WORKER PAID / WORKER WAS SICK BUT ER. THOUGHT HE WAS JUST HOME SICK

03/12/93

MASTRONARDI

NICK D.

NAMED WORKER  
ER. PAID / EPILEPSY/ HEART PROBLEMS

04/28/93

MONTANI/LATI

ROBERT/SH

03/26/93

MASTRONARDI

JAMIE

NAMED WORKER  
ER. PAID REMAINDER THAT WORKER COULD NOT PAY  
MEXICAN CONSULATE WILL REIMBURSE EMPLOYER THE REMAINDER

02/15/93

MASTRONARDI

OLLIE



CARIBBEAN MEDICAL REPATRIATIONS

BARBADOS

WORKER NAME & CODE

EMPLOYER

REPAT DATE

REASON FOR REPAT

Randy Clarysse

June 27/98

Worker developed a bad back, doctors said it could be arthritis.

Randy Vandenhede

July 21/98

Worker refused to work.

Larry Ferket

July 25/98

Worker had a severe case of asthma.

Noel Maertens

August 1/98

Worker did not want to work.

John Pasztor

August 6/98

Worker did not like the work and asked to go home.

Noel Maertens

August 15/98

Worker had a bad attitude, said he was hurt by machinery.

Rick Rebut

August 15/98

Worker fell off a stationary truck and sprained his back.

*Prepared For National Negotiations  
Mfgs. December 1998*

*b.*

BARBADOS

WORKER NAME & CODE

EMPLOYER

REPAT DATE

REASON FOR REPAT

Brent Riddoch

August 15/98

Not a suitable worker.

Ken Vanlaecke

August 15/98

Worker had diabetes, unable to work.

Peter Fiss

August 29/98

Worker admitted to hospital for psychiatric observation, then sent home.

David Vegso

September 12/98

Worker had an infection in his arm, was hospitalized, could not return to work.

Larry Ferket

September 19/98

Was a lazy worker. Upon arrival he told employer he had a sore shoulder. Was also asking locations of hospitals.

Bialine Cebulak

October 3/98

Worker was involved in a car accident, was cleared by the doctor for light duties but wanted to go home.

CARIBBEAN MEDICAL REPATRIATIONS

EAST CARIBBEAN

WORKER NAME & CODE

EMPLOYER

REPAT DATE

REASON FOR REPAT

John Pasztor

June 13/98

Worker complained of a pre-existing back injury.

Mildred Tillotson

August 28/98

Worker may have had hepatitis.

Alvin Lindsay

September 12/98

Worker complained of a pain in the area of his appendix.

CARIBBEAN MEDICAL REPATRIATIONS

JAMAICA

WORKER NAME & CODE

EMPLOYER

REPAT DATE

REASON FOR REPAT

Paul Olsen  
Brookdale Træland Nurseries

May 31/98

Worker spent two weeks in the psychiatric ward, then was sent home.

Abie Epp

June 20/98

Frequently at doctors with blurred vision, upset stomach. Doctors attributed it to nerves.

Gordon Forth

July 24/98

Worker was injured on the farm.

William Toronyl

August 9/98

Worker had a nervous breakdown prior to coming to Canada and could not handle the work.

Val Csetis

August 27/98

Worker developed an allergy problem.

Doug Voegtle

September 18/98

Worker claimed to have sprained his leg, filed a compensation claim but has not been approved.

Frank Hengill

September 21/98

Worker had a hernia operation in the 1997 season. Was requested again by employer and upon arrival complained of a pain, which he claimed was not there when he left Jamaica. Never worked for employer.

JAMAICA

WORKER NAME & CODE

EMPLOYER

REPAY DATE

REASON FOR REPAY

Rene & Eva Schmitz  
Johnnes Fruit Tempallions

September 29/98

Worker injured his finger two days before completion of contract, left with the other workers.

Eldon Walcantus

September 30/98

Worker was injured two days before completion of contract, left with the other workers.

Ed Magda

September 30/98

Worker slipped in tobacco kiln and broke his elbow.

Laurie Hill  
Sunny Brook Orchards

October 5/98

Was admitted to hospital due to swelling, exact problem was never confirmed.

Louis Rottler  
Alberry Farms

October 8/98

Worker was involved in a car accident and was hospitalized.

William Smith

October 18/98

Worker diagnosed with cancer.

Ed Kurtz

October 16/98

Worker did have a cyst on his eyelid, but stayed until his contract was completed, returned with the other workers.

Ken Spriet

October 23/98

Worker was almost finished his contract when he crushed his finger on the farm.

**JAMAICA**

**WORKER NAME & CODE**

**EMPLOYER**

Ben Vangroolheest

**REPAT DATE**

November 12/98

**REASON FOR REPAT**

Worker was stabbed by another farmworker.

CARIBBEAN MEDICAL REPATRIATIONS

TRINIDAD

WORKER NAME & CODE

EMPLOYER

REPAT DATE

REASON FOR REPAT

Douglas Troup  
Lakeles Orchards

June 14/98

Worker was frequently at the doctors complaining of stomach problems.

Boz Toic  
Bosco Farms

June 25/98

Worker developed a sore back.

Antonio Simas

August 6/98

Worker had problems with his back, needed surgery prior to returning to Trinidad.

Gary Ruyke  
Chilps Gardens

August 13/98

Worker complained of sore knees, sore feet, sore fingers. Employer believes the worker wanted to go home.

Peter Bouw

August 22/98

Worker had very bad asthma, was only here for one week.

Rick Vanleuvenhage

September 1/98

Severe case of the chicken pox.

Lawrence Chang

September 3/98

Worker injured his arm changing a tractor tire.

**TRINIDAD**

**WORKER NAME & CODE**

**EMPLOYER**

**REPAT DATE**

**REASON FOR REPAT**

Narel Chesquira

September 10/98

Worker returned due to sore wrists.

Bruce McCoy

September 17/98

Worker fell off a wagon while unloading,  
bruised back muscles.



**2000 MEDICAL REPATRIATIONS - BARBADOS**

| <u>WORKER NAME &amp; CODE</u> | <u>EMPLOYER</u>  | <u>ARRIVAL DATE</u> | <u>REPAT DATE</u> | <u>REASON FOR REPAT</u>                                                                                          |
|-------------------------------|------------------|---------------------|-------------------|------------------------------------------------------------------------------------------------------------------|
|                               | Walter Hanchiruk | May-06              | Jun-01            | Worker had a bad back. He was here two weeks then complained of back pain, could not work.                       |
|                               | Ron Kichter      | Jul-29              | Aug-03            | Worker had a heart condition. Was not to be on the program this season, was sent in error.                       |
|                               | John Janzen      | Apr-15              | Sep-02            | Worker fell off a ladder, was to be off two weeks per doctor, worker wanted to go home.                          |
|                               | Gerald Dierick   | May-06              | Sep-23            | Worker needed surgery, will be returning next season.                                                            |
|                               | Helmut Schankula | Jun-24              | Sep-23            | Worker hurt his finger grading onions, doctor advised him to take two days off but the worker wanted to go home. |

2000 MEDICAL REPATRIATIONS - EAST CARIBBEAN

| <u>WORKER NAME &amp; CODE</u> | <u>EMPLOYER</u> | <u>ARRIVAL DATE</u> | <u>REPAT DATE</u> | <u>REASON FOR REPAT</u>                                                                                       |
|-------------------------------|-----------------|---------------------|-------------------|---------------------------------------------------------------------------------------------------------------|
|                               | Joseph Farrelli | Mar-30              | Jul-20            | Worker had fallen off a ladder earlier in the season. Began to complain of shoulder pain later in the season. |

14

2000 MEDICAL REPATRIATIONS - TRINIDAD

| <u>WORKER NAME &amp; CODE</u> | <u>EMPLOYER</u>   | <u>ARRIVAL DATE</u> | <u>REPAT DATE</u> | <u>REASON FOR REPAT</u>                                                        |
|-------------------------------|-------------------|---------------------|-------------------|--------------------------------------------------------------------------------|
|                               | Boz Toic          | Jun-01              | Jun-15            | Doctors ran tests but were uncertain of the problem.                           |
|                               | Marshall Schuyler | Jul-13              | Jul-29            | Worker was not suited to the weather and had trouble breathing.                |
|                               | Joe Rendulich     | Jul-21              | Jul-29            | Aggravated an old back injury.                                                 |
|                               | Jerry De Carolis  | Jul-25              | Jul-29            | Worker had psychological problems.                                             |
|                               | David Deteuw      | May-11              | Jul-29            | Broken wrist.                                                                  |
|                               | Sante De Carolis  | Jul-26              | Jul-29            | Worker had a swollen jaw and other complications after having a tooth removed. |
|                               | George Sanders    | Jul-27              | Jul-31            | Tobacco poisoning.                                                             |
|                               | Mark Pasfir       | Jul-06              | Jul-31            | Worker had back problems.                                                      |

16.

2000 MEDICAL REPATRIATIONS - TRINIDAD

| <u>WORKER NAME &amp; CODE</u> | <u>EMPLOYER</u>          | <u>ARRIVAL DATE</u> | <u>REPAT DATE</u> | <u>REASON FOR REPAT</u>                                                                                                      |
|-------------------------------|--------------------------|---------------------|-------------------|------------------------------------------------------------------------------------------------------------------------------|
|                               | Boz Toic                 | Apr-20              | Aug-05            | Doctors ran tests but were uncertain of the problem.                                                                         |
|                               | Gage Townsend            | Jul-31              | Aug-10            | Worker fell and dislocated his shoulder.                                                                                     |
|                               | Blaine & Leonard Cebulak | Mar-23              | Aug-18            | Worker broke his leg in the spring. Physiotherapy was not improving his condition.                                           |
|                               | Andre & Wanda Clarysse   | Jul-20              | Aug-31            | Worker injured his knees on the farm.                                                                                        |
|                               | Marshall Schuyler        | Mar-23              | Aug-31            | Chipped a bone in his elbow in the spring and it began to bother him later in the summer.                                    |
|                               | William Scotch           | Jul-13              | Aug-31            | Aggravated existing tendonitis in his left hand.                                                                             |
|                               | Jim Clendenning          | May-18              | Sep-07            | Overall worker was not feeling well, wanted to see a doctor in Trinidad.                                                     |
|                               | Leighton Martin          | Aug-24              | Sep-07            | Worker complained of a sore back after third day of work. He later admitted to being off work for 2 months prior to arrival. |

2000 MEDICAL REPATRIATIONS - TRINIDAD

| <u>WORKER NAME &amp; CODE</u> | <u>EMPLOYER</u>   | <u>ARRIVAL DATE</u> | <u>REPAT DATE</u> | <u>REASON FOR REPAT</u>                                                                |
|-------------------------------|-------------------|---------------------|-------------------|----------------------------------------------------------------------------------------|
|                               | Emiel De Decker   | May-11              | Oct-12            | Worker fell into a fan and cut his hand. Finished his contract.                        |
|                               | William Scotch    | May-04              | Oct-12            | Worker had tendonitis in his thumb.                                                    |
|                               | Marshall Schuyler | Aug-14 (transfer)   | Oct-16            | Worker sprained his ankle, was put on light duty. Worker almost finished his contract. |

2000 MEDICAL REPATRIATIONS - JAMAICA

| <u>WORKER NAME &amp; CODE</u> | <u>EMPLOYER</u>        | <u>ARRIVAL DATE</u> | <u>REPAT DATE</u> | <u>REASON FOR REPAT</u>                                                                                         |
|-------------------------------|------------------------|---------------------|-------------------|-----------------------------------------------------------------------------------------------------------------|
|                               | Gordon Forth           | Apr-20              | Jun-22            | Worker had an ulcer.                                                                                            |
|                               | Bill Nightingale       | May-11              | Jul-07            | Back injury.                                                                                                    |
|                               | Perry & Bev Vanheugten | Jul-26              | Aug-10            | Had a seizure in Jamaica, then had a seizure in Canada.                                                         |
|                               | Bill Nightingale       | Jun-08              | Aug-18            | Worker had his appendix removed.                                                                                |
|                               | Andrew & Debbie Nagy   | Aug-24              | Sep-05            | Worker did have pneumonia, but was not suited to be a kiln hanger.                                              |
|                               | Oscar Ellenberger      | Jul-18              | Sep-06            | Worker had stomach problems. Testis came back negative, possibly a pulled muscle.                               |
|                               | Nabisco (Dresden)      | Aug-17              | Sep-09            | Fractured hand.                                                                                                 |
|                               | Abe Epp                | Mar-30              | Sep-11            | Worker had a hernia, but never complained and never lost a days work. Finished contract with the other workers. |

2000 MEDICAL REPATRIATIONS - JAMAICA

| <u>WORKER NAME &amp; CODE</u> | <u>EMPLOYER</u>             | <u>ARRIVAL DATE</u> | <u>REPAT DATE</u> | <u>REASON FOR REPAT</u>                                                                          |
|-------------------------------|-----------------------------|---------------------|-------------------|--------------------------------------------------------------------------------------------------|
|                               | Phillip Tregunno            | Mar-16              | Sep-11            | Worker had a thyroid condition. Was not a problem this season and he finished his contract.      |
|                               | Dave Kozakiewicz            | Jul-20              | Sep-14            | Primer ran over his wrist, but he finished his contract and returned with the other workers.     |
|                               | Fred Ludwig                 | Aug-31              | Sep-21            | Arrived with an infected finger, need surgery and was going to be off 4-6 weeks.                 |
|                               | Matthew Werner              | Apr-20              | Sep-25            | Worker fell off a wagon and hurt his back and was off for a month. Almost finished his contract. |
|                               | Rick Cleaver / Rick Shrubbs | Aug-31              | Sep-29            | Worker was diagnosed with cancer.                                                                |
|                               | Rene & Eva Schmitz          | May-18              | Oct-02            | Had a growth removed from his shoulder this season. Worker finished his contract.                |
|                               | Ron Tchorek                 | Jul-26              | Oct-04            | Worker cut his finger.                                                                           |
|                               | Ken Forth                   | May-18              | Oct-04            | Worker was sent home for fighting.                                                               |

**2000 MEDICAL REPATRIATIONS - JAMAICA**

| <u>WORKER NAME &amp; CODE</u> | <u>EMPLOYER</u>          | <u>ARRIVAL DATE</u> | <u>REPAT DATE</u> | <u>REASON FOR REPAT</u>                                                             |
|-------------------------------|--------------------------|---------------------|-------------------|-------------------------------------------------------------------------------------|
| Brad Grainger                 | Brad Grainger            | Sep-08              | Oct-11            | Worker hurt his back. Was approved for light duty but the worker wanted to go home. |
| Richard Hamilton              | Richard Hamilton         | Jul-22              | Oct-11            | Worker had a silver removed from his finger.                                        |
| Manuel & Gloria Ferreira      | Manuel & Gloria Ferreira | Jul-31              | Oct-20            | Worker had a silver in his hand.                                                    |
| Fred Ludwig                   | Fred Ludwig              | Aug-31              | Nov-01            | Worker cut his hand the last day of work.                                           |
| Donald Walsh                  | Donald Walsh             | Sep-07 (transfer)   | Nov-01            | Not available.                                                                      |
| Omer Stefina                  | Omer Stefina             | Jul-13              | Nov-03            | Worker had his appendix removed. Missed 2 weeks, then finished his contract.        |
| Jerome Dewulf                 | Jerome Dewulf            | Jul-31              | Nov-03            | Worker had scar tissue removed from his foot. Missed 2 days then finished contract. |
| Frank Vanderbroek             | Frank Vanderbroek        | Apr-27              | Nov-08            | Worker had chest pains toward the end of the season.                                |



2000 MEDICAL REPATRIATIONS - JAMAICA

| <u>WORKER NAME &amp; CODE</u> | <u>EMPLOYER</u> | <u>ARRIVAL DATE</u> | <u>REPAT DATE</u> | <u>REASON FOR REPAT</u> |
|-------------------------------|-----------------|---------------------|-------------------|-------------------------|
|                               | Terry Shaw      | Apr-27              | Nov-08            | Worker hurt his wrist.  |

22

F.A.R.M.S.  
 2001 Harvest System - Ontario  
 Workers by Country and Repatriation Type  
 Medical Repatriations as of 31/12/2001

Report: F39  
 Date: 18/12/2011  
 Time: 12:28 pm  
 Page: 1

| Worker Name           | Worker Code | Birth      | S.I.N. | End Date   | Reason                                        |
|-----------------------|-------------|------------|--------|------------|-----------------------------------------------|
| <b>EAST CARIBBEAN</b> |             |            |        |            |                                               |
|                       |             | 17/12/1953 |        | 30/10/2001 | Injured foot                                  |
|                       |             |            |        | 04/08/2001 | Complained of an irritated eye                |
|                       |             |            |        | 09/08/2001 | Broken finger                                 |
| <b>JAMAICA</b>        |             |            |        |            |                                               |
|                       |             | 04/08/1964 |        | 24/09/2001 | Hurt back and shoulders                       |
|                       |             | 16/09/1960 |        | 29/11/2001 | Kidney stones, surgery                        |
|                       |             | 04/08/1959 |        | 28/07/2001 | Hernia                                        |
|                       |             | 02/04/1969 |        | 27/07/2001 | Broken arm                                    |
|                       |             | 01/05/1972 |        | 18/10/2001 | Schizophrenic                                 |
|                       |             | 12/02/1968 |        | 16/09/2001 | Back injury                                   |
|                       |             | 10/01/1949 |        | 09/11/2001 | Stomach ailment                               |
|                       |             | 24/02/1971 |        | 10/10/2001 | Groin injury                                  |
|                       |             | 13/09/1944 |        | 21/07/2001 | Broken wrist                                  |
|                       |             | 19/04/1963 |        | 19/09/2001 | Aggravated his hernia                         |
|                       |             | 21/07/1963 |        | 28/09/2001 | Sprained finger                               |
|                       |             | 30/07/1966 |        | 12/10/2001 | Fell off a ladder and fractured ribs          |
|                       |             | 17/03/1957 |        | 05/09/2001 | Head injury from car accident                 |
|                       |             | 09/06/1955 |        | 31/07/2001 | Fell off a ladder, injured back               |
|                       |             | 23/04/1952 |        | 07/09/2001 | Worker fell and injured his back              |
|                       |             | 25/11/1969 |        | 23/11/2001 | Worker hurt his back                          |
|                       |             | 29/09/1962 |        | 08/11/2001 | Injured leg on the harvester                  |
|                       |             | 15/07/1965 |        | 05/09/2001 | Sore back, legs from car accident             |
|                       |             | 07/02/1956 |        | 16/09/2001 | Injured finger                                |
| <b>BARBADOS</b>       |             |            |        |            |                                               |
|                       |             | 25/04/1975 |        | 21/09/2001 | Diabetes                                      |
|                       |             | 24/07/1975 |        | 02/11/2001 | Injured tailbone falling off ladder           |
|                       |             | 10/02/1968 |        | 24/10/2001 | Broken ribs                                   |
|                       |             | 19/08/1962 |        | 24/08/2001 | Pulled muscle in leg                          |
| <b>MEXICO</b>         |             |            |        |            |                                               |
|                       |             | 13/07/1965 |        | 11/10/2001 | Kidney failure                                |
|                       |             | 11/01/1962 |        | 25/10/2001 | Claimed to have an injured back               |
|                       |             | 19/01/1958 |        | 02/10/2001 | Hurt his back                                 |
|                       |             | 28/12/1951 |        | 29/08/2001 | Lower back injury                             |
|                       |             | 19/09/1959 |        | 18/09/2001 | Had appendix removed                          |
|                       |             | 27/06/1961 |        | 30/08/2001 | Stress and insomnia                           |
|                       |             | 03/05/1954 |        | 18/09/2001 | Pre-existing hand injury                      |
|                       |             | 16/08/1975 |        | 18/09/2001 | Sprained ankle                                |
|                       |             | 31/05/1969 |        | 18/11/2001 | Brain aneurysm                                |
|                       |             | 11/07/1968 |        | 15/08/2001 | Wrist injury from car accident in Barbados    |
|                       |             |            |        | 15/12/2001 | Injured back, surgery                         |
|                       |             |            |        | 13/07/2001 | Homesick, broke his arm day before s/b flight |
|                       |             |            |        | 20/04/2001 | Stomach problems, possibly an ulcer           |
|                       |             |            |        | 03/05/2001 | Sore back                                     |
|                       |             |            |        | 07/06/2001 | Stomach problems                              |
|                       |             |            |        | 15/05/2001 | Back problems                                 |
|                       |             |            |        | 05/06/2001 | Gastritis                                     |
|                       |             |            |        | 15/06/2001 | Intestinal problems                           |
|                       |             |            |        | 19/06/2001 | Liver problems                                |
|                       |             |            |        | 05/06/2001 | Groin problem                                 |
|                       |             |            |        | 13/07/2001 | No medical problem, family problems           |

**F.A.R.M.S.**  
**2001 Harvest System - Ontario**  
**Workers by Country and Repatriation Type**  
**Medical Repatriations as of 31/12/2001**

Report: F39  
 Date: 19/12/2011  
 Time: 12:28 pm  
 Page: 2

| Worker Name | Worker Code     | Birth      | S.I.N.     | End Date   | Reason                                   |
|-------------|-----------------|------------|------------|------------|------------------------------------------|
| MEXICO      |                 | 21/02/1947 |            | 15/08/2001 | Diabetes, bad heart                      |
|             |                 | 07/12/1951 |            | 19/06/2001 | Stomach problems                         |
|             |                 | 12/11/1960 |            | 29/06/2001 | Stomach problems                         |
|             |                 | 30/09/1954 |            | 13/07/2001 | Headaches                                |
|             |                 | 27/08/1955 |            | 20/06/2001 | Brain tumour                             |
|             |                 | 16/07/1956 |            | 12/08/2001 | Heart problems, high cholesterol         |
|             |                 | 05/06/1949 |            | 08/06/2001 | Sore back and side                       |
|             |                 | 27/04/1948 |            | 10/07/2001 | Chest pains, anxiety attacks             |
|             |                 |            |            | 15/06/2001 | Stomach, liver and gall bladder problems |
|             |                 | 08/05/1961 |            | 08/06/2001 | Slight leg pain                          |
|             |                 | 02/06/1960 |            | 18/05/2001 | Intestinal problem                       |
|             |                 | 27/07/1958 |            | 01/06/2001 | Kidney stones                            |
|             |                 | 20/03/1974 |            | 29/06/2001 | Worker diagnosed with cancer             |
|             |                 | 13/06/1963 |            | 26/08/2001 | Worker diagnosed with cancer             |
|             | TRINIDAD/TOBAGO |            | 10/10/1963 |            | 04/08/2001                               |
|             |                 | 27/09/1960 |            | 18/09/2001 | Sore shoulder                            |
|             |                 | 26/10/1957 |            | 23/08/2001 | Problem with legs                        |
|             |                 | 22/12/1974 |            | 09/04/2001 | Sore back                                |
|             |                 |            |            | 23/08/2001 | Claimed to have a wrist injury           |
|             |                 | 10/07/1971 |            | 26/03/2001 | Sore back                                |
|             |                 |            |            | 23/08/2001 | Claimed to have a wrist injury           |
|             |                 | 08/01/1974 |            | 23/08/2001 | Claimed to have a wrist injury           |
|             |                 |            |            | 09/08/2001 | Fainted in field                         |
|             |                 | 08/01/1976 |            | 04/10/2001 | Muscle strain in back                    |
|             |                 | 21/07/1963 |            | 21/08/2001 | Complained of a sore back                |
|             |                 | 29/05/1958 |            | 21/08/2001 | Pre-existing back injury                 |
|             | 08/11/1965      |            | 08/09/2001 | Sore back  |                                          |

Number of Workers: 74

F.A.R.M.S.  
2002 Harvest System - Ontario  
Workers by Country and Repatriation Type  
Medical Repatriations as of 31/12/2002

Report: F39  
Date: 19/12/2011  
Time: 12:29 pm  
Page: 1

| Worker Name     | Worker Code | Birth      | S.I.N.      | End Date   | Reason                                             |
|-----------------|-------------|------------|-------------|------------|----------------------------------------------------|
| EAST CARIBBEAN  |             | 08/04/1976 |             | 12/09/2002 | Complications from previous surgery                |
|                 |             | 18/07/1954 |             | 26/09/2002 | Heart attack                                       |
| TRINIDAD/TOBAGO |             | 17/08/1963 |             | 23/04/2002 | Depression, homesick                               |
|                 |             | 22/05/1975 |             | 01/10/2002 | Severe arthritis                                   |
|                 |             | 30/12/1974 |             | 12/08/2002 | Bad flu shortly after arrival                      |
|                 |             | 02/04/1958 |             | 24/09/2002 | Injured shoulder                                   |
|                 |             | 03/08/1959 |             | 10/09/2002 | Tobacco allergy                                    |
|                 |             | 01/09/1968 |             | 30/09/2002 | Workers feet went numb                             |
|                 |             |            |             | 10/09/2002 | Tobacco poisoning                                  |
|                 |             | 02/07/1970 |             | 30/08/2002 | Swollen wrist                                      |
|                 |             |            |             | 24/07/2002 | Seizure on the plane coming to Canada              |
|                 |             | 30/01/1961 |             | 09/08/2002 | Tuberculosis                                       |
|                 |             | 23/04/1970 |             | 30/08/2002 | Tobacco poisoning                                  |
|                 |             | 14/06/1969 |             | 04/07/2002 | Stomach problems                                   |
|                 |             | 06/08/1964 |             | 15/08/2002 | Appendicitis                                       |
| JAMAICA         |             | 21/01/1963 |             | 01/11/2002 | Back problems                                      |
|                 |             | 09/04/1962 |             | 05/10/2002 | Severe carpal tunnel syndrome                      |
|                 |             | 17/05/1967 |             | 11/11/2002 | Injured leg on a tow bar                           |
|                 |             | 19/01/1951 |             | 04/11/2002 | Hernia                                             |
|                 |             | 23/11/1974 |             | 09/08/2002 | Sprained chest wall                                |
|                 |             | 17/10/1973 |             | 29/08/2002 | Hurt back lifting tomatoes                         |
|                 |             | 19/02/1962 |             | 18/09/2002 | Injured Hand                                       |
|                 |             |            |             | 03/12/2002 | Fell off apple truck, multiple fractures, visa ext |
|                 |             | 27/04/1969 |             | 05/10/2002 | Lump on his neck                                   |
|                 |             | 19/02/1974 |             | 09/10/2002 | Twisted ankle                                      |
|                 |             | 06/12/1943 |             | 15/08/2002 | Swollen hand due to insect bite                    |
|                 |             |            |             | 15/11/2002 | Slipped off a step and tore ligaments              |
|                 |             | 11/06/1957 |             | 04/12/2002 | Finished contract 04Dec                            |
|                 |             | 24/09/1966 |             | 01/10/2002 | Bleeding ulcer                                     |
|                 |             | 06/01/1967 |             | 23/08/2002 | Strained back                                      |
|                 |             | 03/08/1970 |             | 29/10/2002 | Bowel problems                                     |
|                 |             |            |             | 17/04/2002 | Swollen ankle and leg due to infection             |
|                 |             | 05/05/1968 |             | 12/08/2002 | Sick, wanted to go home                            |
|                 |             | 23/12/1946 |             | 25/11/2002 | Heart attack                                       |
|                 |             | 15/05/1966 |             | 17/09/2002 | Hyperthyroidism                                    |
|                 |             | 12/03/1970 |             | 22/11/2002 | Bruised foot, finished his contract                |
|                 |             | 24/04/1946 |             | 07/11/2002 | Injured finger, completed contract                 |
|                 |             |            |             | 21/08/2002 | Stomach pains                                      |
|                 |             | 20/05/1948 |             | 05/11/2002 | Leg problems from previous auto accident           |
|                 |             | 02/10/1959 |             | 19/08/2002 | Appendix removed                                   |
|                 |             | 24/10/1977 |             | 01/11/2002 | Boil removed from his hand                         |
|                 |             | 14/01/1960 |             | 04/10/2002 | Injured his leg                                    |
|                 |             | 27/11/1949 |             | 21/09/2002 | Broken tip of finger                               |
| BARBADOS        |             | 19/04/1971 | 816-275-399 | 26/08/2002 | Worker slipped, approved to work by 2 doctors      |

**F.A.R.M.S.**  
**2002 Harvest System - Ontario**  
**Workers by Country and Repatriation Type**  
**Medical Repatriations as of 31/12/2002**

Report: F39  
 Date: 19/12/2011  
 Time: 12:29 pm  
 Page: 2

| Worker Name     | Worker Code | Birth      | S.I.N. | End Date   | Reason                                              |
|-----------------|-------------|------------|--------|------------|-----------------------------------------------------|
| <b>BARBADOS</b> |             |            |        |            |                                                     |
|                 |             | 01/12/1939 |        | 15/10/2002 | Trailer ran over his foot                           |
|                 |             | 25/06/1973 |        | 17/10/2002 | Employer suggests non-medical reasons for repat     |
|                 |             | 01/09/1953 |        | 22/10/2002 | Lost the tip of his finger                          |
|                 |             | 27/01/1973 |        | 17/10/2002 | Employer suggests non-medical reasons for repat     |
|                 |             | 30/06/1957 |        | 09/08/2002 | Worker was a large man, not suited for the work     |
|                 |             | 05/03/1981 |        | 05/11/2002 | Worker cut his finger, finished his contract        |
|                 |             | 28/10/1969 |        | 15/08/2002 | Tobacco poisoning                                   |
| <b>MEXICO</b>   |             |            |        |            |                                                     |
|                 |             | 05/04/1964 |        | 09/07/2002 | Reason unknown                                      |
|                 |             | 05/07/1969 |        | 16/08/2002 | Problem with stomach acid                           |
|                 |             | 24/02/1963 |        | 10/05/2002 | Wanted to see his own doctor in Mexico              |
|                 |             | 05/11/1970 |        | 24/09/2002 | Hernia operation                                    |
|                 |             | 14/10/1972 |        | 06/08/2002 | Work was too hard                                   |
|                 |             | 15/12/1968 |        | 13/09/2002 | Psychological problems                              |
|                 |             | 13/05/1974 |        | 19/07/2002 | Diabetic, hospitalized                              |
|                 |             | 07/06/1951 |        | 21/08/2002 | Mental illness                                      |
|                 |             | 14/07/1962 |        | 18/10/2002 | Shingles                                            |
|                 |             |            |        | 09/08/2002 | Rash, wanted treatment in Mexico                    |
|                 |             | 11/06/1978 |        | 12/07/2002 | Travelled outside Canag                             |
|                 |             | 03/03/1953 |        | 08/04/2002 | Diagnosed with cancer                               |
|                 |             | 02/02/1969 |        | 23/07/2002 | Problem with his eyes, iritis                       |
|                 |             | 10/05/1964 |        | 18/10/2002 | Eye problems                                        |
|                 |             | 03/03/1960 |        | 04/12/2002 | Surgery on finger                                   |
|                 |             | 29/12/1964 |        | 15/10/2002 | Cut his finger, finished contract                   |
|                 |             | 20/07/1960 |        | 02/08/2002 | Should be domestic, sick child                      |
|                 |             | 08/02/1968 |        | 14/06/2002 | Inner ear problem                                   |
|                 |             | 18/10/1956 |        | 31/05/2002 | Worker had gout, stomach problems                   |
|                 |             | 19/07/1964 |        | 19/07/2002 | Back problems                                       |
|                 |             | 24/01/1978 |        | 02/08/2002 | Reason unknown                                      |
|                 |             | 22/04/1971 |        | 27/09/2002 | Not sick, just wanted to go home                    |
|                 |             | 24/05/1964 |        | 30/08/2002 | Pulled muscles in his back                          |
|                 |             | 05/11/1964 |        | 39/08/2002 | Homesick                                            |
|                 |             | 02/07/1960 |        | 11/06/2002 | Wanted to be treated in Mexico                      |
|                 |             | 05/12/1966 |        | 18/06/2002 | Complained of chest pain                            |
|                 |             | 31/07/1964 |        | 28/09/2002 | Worker had an appendectomy                          |
|                 |             | 08/06/1961 |        | 30/07/2002 | Legs hurt, cleared to work, not happy with the work |
|                 |             | 30/11/1961 |        | 23/08/2002 | Hurt his back                                       |
|                 |             |            |        | 06/09/2002 | Parsites in his stomach, headaches                  |
|                 |             | 15/03/1966 |        | 31/05/2002 | Hip problems                                        |
|                 |             | 08/11/1960 |        | 09/07/2002 | Bleeding ulcers, previous condition                 |
|                 |             | 24/06/1962 |        | 23/04/2002 | Suffering from depression                           |
|                 |             | 14/04/1959 |        | 21/10/2002 | Hepatitis A, off one week, finished contract        |
|                 |             | 26/05/1966 |        | 09/08/2002 | Chronic back problem                                |
|                 |             | 02/03/1970 |        | 30/04/2002 | Worker was diabetic                                 |
|                 |             | 23/07/1956 |        | 09/08/2002 | High blood pressure, high cholesterol               |

F.A.R.M.S.  
 2002 Harvest System - Ontario  
 Workers by Country and Repatriation Type  
 Medical Repatriations as of 31/12/2002

Report: F39  
 Date: 19/12/2011  
 Time: 12:29 pm  
 Page: 3

| Worker Name | Worker Code | Birth      | S.I.N. | End Date   | Reason                                              |
|-------------|-------------|------------|--------|------------|-----------------------------------------------------|
| MEXICO      |             |            |        |            |                                                     |
|             |             | 20/07/1970 |        | 19/09/2002 | Back pain                                           |
|             |             | 30/06/1950 |        | 10/04/2002 | Hepatitis                                           |
|             |             | 21/06/1972 |        | 25/06/2002 | Sick, wanted treatment in Mexico                    |
|             |             | 02/11/1975 |        | 21/06/2002 | Tooth problems                                      |
|             |             | 07/09/1972 |        | 05/07/2002 | Slipped on steps, fractured foot                    |
|             |             | 16/10/1959 |        | 23/10/2002 | Fell and hurt shoulder                              |
|             |             | 08/11/1967 |        | 04/12/2002 |                                                     |
|             |             | 12/01/1971 |        | 23/08/2002 | Serious ear infection                               |
|             |             | 24/04/1957 |        | 27/09/2002 | Sore leg                                            |
|             |             | 19/11/1949 |        | 16/08/2002 | Back pain, siatic nerve                             |
|             |             | 24/04/1958 |        | 01/03/2002 | Worker was having seizures.                         |
|             |             | 21/11/1977 |        | 09/08/2002 | Hernia operation prior to coming, worked light duty |
|             |             | 11/12/1966 |        | 05/10/2002 |                                                     |
|             |             | 11/07/1969 |        | 10/09/2002 | Reason unknown, given pills                         |
|             |             | 20/06/1972 |        | 05/07/2002 | Stomach problems                                    |
|             |             | 11/04/1965 |        | 05/10/2002 | Internal infection, hospitalized 2-3 days           |
|             |             | 20/06/1960 |        | 09/08/2002 | Complained of headaches                             |
|             |             | 17/01/1984 |        | 06/09/2002 | Mole on his head, nothing wrong                     |
|             |             | 22/07/1964 |        | 09/08/2002 | Gout in his knees                                   |
|             |             | 11/01/1952 |        | 26/08/2002 | Not sick, dr. cleared to work                       |
|             |             | 03/11/1970 |        | 04/06/2002 | Did not like the smell in the greenhouse            |
|             |             | 24/10/1965 |        | 06/08/2002 | Reason unknown                                      |
|             |             | 19/09/1975 |        | 05/10/2002 | Claimed to be sick                                  |
|             |             | 35/09/1960 |        | 28/06/2002 | Worker wanted to go home                            |

Number of Workers: 112

**F.A.R.M.S.**  
**2003 Harvest System - Ontario**  
**Workers by Country and Repatriation Type**  
**Medical Repatriations as of 31/12/2003**

Report: F39  
 Date: 19/12/2011  
 Time: 12:30 pm  
 Page: 1

| Worker Name            | Worker Code | Birth      | S.I.N.     | End Date                                 | Reason                                      |
|------------------------|-------------|------------|------------|------------------------------------------|---------------------------------------------|
| <b>BARBADOS</b>        |             | 08/08/1961 |            | 02/09/2003                               | Injured.                                    |
|                        |             | 25/12/1976 |            | 24/07/2003                               | Was injured.                                |
|                        |             | 06/03/1963 |            | 16/09/2003                               | Sick.                                       |
|                        |             | 07/04/1970 |            | 04/11/2003                               | Pulled back muscle, but was due to go home. |
| <b>TRINIDAD/TOBAGO</b> |             | 06/07/1979 |            | 02/12/2003                               | Burned his hand                             |
|                        |             | 01/08/1960 |            | 09/10/2003                               | Has cancer.                                 |
| <b>MEXICO</b>          |             | 05/10/1971 |            | 22/08/2003                               | Internal Bleeding                           |
|                        |             | 02/01/1965 |            | 11/09/2003                               | Pre-existing Arthritis                      |
|                        |             | 03/11/1970 |            | 04/09/2003                               | Had a rash, wanted to go home.              |
|                        |             | 16/09/1978 |            | 11/09/2003                               | Strained Shoulder                           |
|                        |             | 15/12/1978 |            | 04/09/2003                               | Injured, wanted to go home.                 |
|                        |             | 12/11/1975 |            | 22/08/2003                               | Problems with leg muscle.                   |
|                        |             | 31/07/1967 |            | 26/09/2003                               | Pulled muscle.                              |
|                        |             |            |            | 18/09/2003                               | Tobacco poisoned, wanted to go home.        |
|                        |             | 10/09/1961 |            | 20/06/2003                               | Hit by a car, broke collarbone.             |
|                        |             | 03/07/1963 |            | 25/07/2003                               | Feeling sick.                               |
|                        | 10/01/1973  |            | 12/09/2003 | Sick.                                    |                                             |
|                        | 17/01/1962  |            | 19/08/2003 | Injured.                                 |                                             |
|                        | 27/10/1967  |            | 25/07/2003 | Feeling sick.                            |                                             |
|                        | 21/06/1954  |            | 12/09/2003 | Worked in field with fever, had seizure. |                                             |
|                        | 15/09/1962  |            | 10/06/2003 | Wanted to go home                        |                                             |
|                        | 12/02/1964  |            | 23/10/2003 | Feeling sick, hospitalized.              |                                             |
|                        | 10/09/1966  |            | 12/09/2003 | Er. reports that he falsified an injury  |                                             |
|                        | 28/03/1956  |            | 15/12/2003 | Rigth Arm Amputated                      |                                             |
|                        | 20/02/1961  |            | 09/08/2003 | Hernia.                                  |                                             |
|                        | 03/02/1952  |            | 12/08/2003 | Hurt his knee.                           |                                             |
|                        | 10/10/1975  |            | 09/09/2003 | Feeling sick.                            |                                             |
|                        | 17/09/1964  |            | 29/07/2003 | RBC Case                                 |                                             |
|                        | 30/07/1972  |            | 04/07/2003 | Had a sore stomach.                      |                                             |
|                        | 20/08/1978  |            | 18/07/2003 | Pre-existing medical condition.          |                                             |
|                        | 06/06/1958  |            | 08/11/2003 | Cerebral Hemorrhage                      |                                             |
|                        | 12/12/1960  |            | 17/09/2003 | Leg Injured, wants to go home            |                                             |
|                        | 17/07/1963  |            | 22/05/2003 | Has allergies, wants to go home          |                                             |
|                        | 02/02/1958  |            | 09/09/2003 | Has gout on right foot.                  |                                             |
|                        | 12/08/1968  |            | 28/10/2003 | Chronic migraines.                       |                                             |
|                        | 17/11/1966  |            | 02/07/2003 | Injured eye.                             |                                             |
|                        | 16/06/1956  |            | 11/10/2003 | Injured shoulder.                        |                                             |
|                        | 19/06/1958  |            | 01/08/2003 | Stomach problems.                        |                                             |
|                        | 03/10/1974  |            | 20/06/2003 | Back injury.                             |                                             |
|                        | 05/06/1977  |            | 09/10/2003 | Homesick.                                |                                             |
|                        | 23/02/1958  |            | 28/02/2003 | Homesick                                 |                                             |
|                        | 06/11/1956  |            | 26/06/2003 | Arthritis in knee.                       |                                             |
|                        | 24/05/1943  |            | 31/07/2003 | Prostate Cancer                          |                                             |
|                        | 06/06/1945  |            | 12/09/2003 | Breathing problems at night.             |                                             |
|                        | 28/05/1963  |            | 10/10/2003 | Fingertip was cut off while working.     |                                             |
|                        | 27/02/1954  |            | 12/11/2003 | Mentally ill, suicidal.                  |                                             |
|                        | 01/12/1957  |            | 22/10/2003 | Knee problems.                           |                                             |
|                        | 21/10/1945  |            | 29/07/2003 | Pre-existing leg pain.                   |                                             |
|                        | 22/01/1966  |            | 02/05/2003 | Depression, anxiety attacks.             |                                             |
|                        | 21/04/1974  |            | 17/09/2003 | Swollen Testicles                        |                                             |

F.A.R.M.S.  
 2003 Harvest System - Ontario  
 Workers by Country and Repatriation Type  
 Medical Repatriations as of 31/12/2003

Report: F39  
 Date: 19/12/2011  
 Time: 12:30 pm  
 Page: 2

| Worker Name    | Worker Code | Birth      | S.I.N. | End Date   | Reason                                            |
|----------------|-------------|------------|--------|------------|---------------------------------------------------|
| <b>MEXICO</b>  |             |            |        |            |                                                   |
|                |             | 26/08/1952 |        | 23/09/2003 | Mass in Stomach                                   |
|                |             | 08/11/1967 |        | 17/09/2003 | Groin Pull                                        |
|                |             | 05/06/1980 |        | 30/09/2003 | Unwell,wants to go home                           |
|                |             | 06/03/1980 |        | 19/09/2003 | Back problems.                                    |
|                |             | 16/07/1974 |        | 06/08/2003 | Allergies.                                        |
|                |             | 27/07/1954 |        | 06/06/2003 | Injured                                           |
|                |             | 15/04/1950 |        | 24/11/2003 | Severe hand injury                                |
|                |             | 24/03/1977 |        | 12/09/2003 | Stomach problems.                                 |
|                |             | 19/09/1958 |        | 26/06/2003 | Problems with leg muscle.                         |
|                |             | 07/11/1950 |        | 01/12/2003 | Stroke in the Left Eye                            |
|                |             | 20/08/1978 |        | 04/07/2003 | Headaches, sore neck.                             |
|                |             | 29/11/1949 |        | 21/10/2003 | Bad circulation in leg.                           |
|                |             | 08/02/1965 |        | 23/08/2003 | Complained of stomach pain.                       |
|                |             | 25/05/1965 |        | 17/06/2003 | Feeling sick, wanted to go home.                  |
|                |             | 07/08/1962 |        | 15/05/2003 | Has allergies                                     |
|                |             | 08/09/1955 |        | 15/05/2003 | Knee Problem                                      |
|                |             | 06/01/1964 |        | 06/06/2003 | Sick                                              |
|                |             | 13/01/1975 |        | 20/10/2003 | Fell and hurt himself.                            |
|                |             | 26/09/1971 |        | 22/08/2003 | Feeling sick.                                     |
|                |             | 12/05/1970 |        | 10/10/2003 | Hurt her knee.                                    |
|                |             | 06/08/1977 |        | 10/10/2003 | Throat infection.                                 |
|                |             | 22/07/1961 |        | 22/08/2003 | Health reasons.                                   |
|                |             | 28/01/1975 |        | 22/07/2003 | Had an infection.                                 |
|                |             | 28/07/1955 |        | 02/09/2003 | Hospitalized for illness.                         |
|                |             | 05/11/1975 |        | 23/09/2003 | House was robbed.                                 |
|                |             | 08/06/1953 |        | 16/09/2003 | Drunk, fell off bike, broke collar bone.          |
| <b>JAMAICA</b> |             |            |        |            |                                                   |
|                |             | 18/09/1961 |        | 03/11/2003 | Back hurting.                                     |
|                |             | 30/11/1971 |        | 05/11/2003 | Has tendonitis                                    |
|                |             | 29/05/1983 |        | 25/08/2003 | Claimed to have back injury.                      |
|                |             | 08/12/1988 |        | 20/10/2003 | Feeling sick.                                     |
|                |             | 12/09/1957 |        | 19/08/2003 | Due to an injury.                                 |
|                |             | 20/10/1942 |        | 18/09/2003 | Fell off a tractor, had a concussion.             |
|                |             | 03/04/1972 |        | 14/09/2003 | A machine fell on him, hurt his leg.              |
|                |             | 06/04/1966 |        | 18/09/2003 | Not feeling well.                                 |
|                |             | 06/05/1960 |        | 08/10/2003 | Finger was hurting, wanted to go home.            |
|                |             | 24/12/1954 |        | 08/09/2003 | Back injury.                                      |
|                |             | 30/01/1966 |        | 19/11/2003 | Had varicose vein removed 3 wks. ago, completion. |
|                |             | 13/09/1966 |        | 10/12/2003 | injury from 2002 accident                         |
|                |             | 12/11/1964 |        | 24/10/2003 | injured thumb earlier, but er. says no work.      |
|                |             | 27/05/1965 |        | 27/10/2003 | injured both arms, caught in machinery.           |
|                |             | 08/01/1972 |        | 21/11/2003 | Fell out of tree, homesick                        |
|                |             | 02/10/1973 |        | 29/10/2003 | Had surgery to remove lump on hand.               |
|                |             | 14/06/1978 |        | 27/10/2003 | Fell out of a tree and injured his back.          |
|                |             | 25/12/1971 |        | 22/07/2003 | Stomach problems.                                 |
|                |             | 26/07/1966 |        | 09/10/2003 | Personal sickness.                                |
|                |             | 22/01/1980 |        | 03/10/2003 | Asthma.                                           |
|                |             | 08/09/1969 |        | 12/09/2003 | Tendonitis.                                       |



**F.A.R.M.S.**  
**2003 Harvest System - Ontario**  
**Workers by Country and Repatriation Type**  
**Medical Repatriations as of 31/12/2003**

Report: F39  
 Date: 19/12/2011  
 Time: 12:30 pm  
 Page: 3

| Worker Name | Worker Code | Birth      | S.I.N. | End Date   | Reason                                             |
|-------------|-------------|------------|--------|------------|----------------------------------------------------|
| JAMAICA     |             | 01/08/1960 |        | 01/10/2003 | Developed diabetes.                                |
|             |             | 02/07/1977 |        | 17/04/2003 | Not Working Out                                    |
|             |             | 20/11/1955 |        | 29/09/2003 | Er. reported contract completion.                  |
|             |             | 15/09/1967 |        | 30/10/2003 | Feeling sick, stomach problems.                    |
|             |             | 19/08/1976 |        | 28/08/2003 | Health reasons.                                    |
|             |             | 21/04/1956 |        | 05/11/2003 | Back Problem                                       |
|             |             | 26/06/1960 |        | 25/09/2003 | Er. reported contract completion.                  |
|             |             | 23/12/1969 |        | 03/10/2003 | Ulcer.                                             |
|             |             | 22/07/1958 |        | 30/04/2003 | Leg Injury - on crutches                           |
|             |             | 23/09/1960 |        | 07/11/2003 | Back problems.                                     |
|             |             | 24/09/1970 |        | 19/11/2003 | Injured but back to work, contract completion.     |
|             |             | 19/03/1969 |        | 11/10/2003 | Dropped something on foot, but er. says completion |
|             |             | 13/08/1967 |        | 30/10/2003 | Had cut on knee, but er. says work completed.      |
|             |             |            |        | 11/10/2003 | Fell out of bed; hurt his shoulder.                |
|             |             | 18/09/1971 |        | 23/08/2003 | Hurt finger priming tobacco.                       |
|             |             | 19/09/1951 |        | 15/11/2003 | High blood pressure, went on dialysis.             |
|             |             |            |        | 15/11/2003 | Sore Arm                                           |
|             |             | 17/03/1963 |        | 17/08/2003 | Severely cut his arm on the job, had surgery.      |
|             |             | 07/09/1971 |        | 20/10/2003 | Injured on tractor, also mother is ill.            |
|             |             | 01/05/1974 |        | 11/10/2003 | Injured his back.                                  |
|             |             | 15/12/1971 |        | 03/10/2003 | Hurt his finger.                                   |
|             |             | 30/04/1970 |        | 19/09/2003 | Sick.                                              |

Number of Workers: 119

F.A.R.M.S.  
 2004 Harvest System - Ontario  
 Workers by Country and Repatriation Type  
 Medical Repatriations as of 31/12/2004

Report: F39  
 Date: 19/12/2011  
 Time: 12:31 pm  
 Page: 1

| Worker Name     | Worker Code | Birth      | S.I.N.     | End Date                                           | Reason                                             |
|-----------------|-------------|------------|------------|----------------------------------------------------|----------------------------------------------------|
| TRINIDAD/TOBAGO |             | 03/09/1971 |            | 12/08/2004                                         | Deep Cut on Hand                                   |
|                 |             | 20/03/1979 |            | 07/10/2004                                         | Unable to do the work                              |
|                 |             | 19/11/1977 |            | 07/05/2004                                         | Hurt his knee                                      |
|                 |             | 12/03/1969 |            | 14/09/2004                                         | Pulled muscle in shoulder                          |
|                 |             | 02/01/1980 |            | 16/09/2004                                         | Injured his finger                                 |
| EAST CARIBBEAN  |             |            |            |                                                    |                                                    |
| JAMAICA         |             | 07/09/1965 |            | 23/12/2004                                         | Personal Surgey                                    |
|                 |             | 22/03/1981 |            | 10/11/2004                                         | Stomach problems                                   |
|                 |             | 20/09/1953 |            | 01/10/2004                                         | Hernia, completed contract                         |
|                 |             | 11/12/1952 |            | 09/09/2004                                         | Injured                                            |
|                 |             | 08/07/1957 |            | 03/09/2004                                         | Injured in car accident                            |
|                 |             | 05/03/1975 |            | 24/09/2004                                         | Surgery for hernia, but finished contract          |
|                 |             | 20/06/1975 |            | 30/10/2004                                         | Problem with eyes but finished contract as per er. |
|                 |             | 09/11/1973 |            | 01/10/2004                                         | Cut 2 fingers, but only 2 days of work left        |
|                 |             | 28/10/1942 |            | 29/11/2004                                         | Light stroke in October, therapy                   |
|                 |             | 04/05/1970 |            | 02/12/2004                                         | Back injury early in season, therapy               |
|                 |             | 14/07/1954 |            | 19/11/2004                                         | Diagnosed w/ leukemia but finished work as per er. |
|                 |             | 14/01/1982 |            | 08/10/2004                                         | Injured on farm                                    |
|                 |             | 30/07/1958 |            | 08/10/2004                                         | Hurt on a tractor                                  |
|                 |             | 28/02/1963 |            | 03/04/2004                                         | Cut his finger, will take up to 12 wks. to heal    |
|                 |             | 22/05/1989 |            | 25/11/2004                                         | Found lung cancer- tumor                           |
|                 |             | 30/01/1973 |            | 23/07/2004                                         | Homesick                                           |
|                 |             | 20/05/1971 |            | 18/09/2004                                         | Headaches, test results negative-wanted to go home |
|                 |             | 02/02/1949 |            | 26/11/2004                                         | Herniated disc in back, but finished contract      |
|                 | 11/02/1973  |            | 15/11/2004 | Strained back                                      |                                                    |
|                 | 07/08/1973  |            | 24/09/2004 | Abdominal pain, wanted to go home                  |                                                    |
|                 | 11/10/1956  |            | 21/09/2004 | Broke his wrist                                    |                                                    |
|                 | 21/04/1956  |            | 28/09/2004 | Back problem                                       |                                                    |
|                 | 09/03/1972  |            | 29/11/2004 | Hit by a car                                       |                                                    |
|                 | 07/06/1974  |            | 03/09/2004 | Health problems                                    |                                                    |
|                 | 05/01/1965  |            | 12/11/2004 | Hurt his knee, but booked to go home for this date |                                                    |
|                 | 24/01/1956  |            | 25/08/2004 | Back and hip problems                              |                                                    |
|                 | 27/04/1976  |            | 28/08/2004 | Didn't want to work as per employer                |                                                    |
|                 | 12/09/1977  |            | 17/09/2004 | Worker didn't specify reason as per er.            |                                                    |
|                 | 30/05/1951  |            | 16/11/2004 | Surgery for kidney problems                        |                                                    |
|                 | 01/03/1964  |            | 18/09/2004 | Broke his hand                                     |                                                    |
|                 | 22/07/1960  |            | 13/08/2004 | On meds for bad back, condition worsened           |                                                    |
| BARBADOS        |             | 17/10/1956 |            | 14/09/2004                                         | Hurt his back                                      |
|                 |             | 31/10/1961 |            | 04/12/2004                                         | Rectal surgery                                     |
|                 |             | 22/05/1958 |            | 11/09/2004                                         | Hurt his back                                      |
|                 |             | 11/04/1967 |            | 04/12/2004                                         | Had surgery for growth on eye                      |

F.A.R.M.S.  
 2004 Harvest System - Ontario  
 Workers by Country and Repatriation Type  
 Medical Repatriations as of 31/12/2004

Report: F39  
 Date: 19/12/2011  
 Time: 12:31 pm  
 Page: 2

| Worker Name     | Worker Code | Birth      | S.I.N. | End Date   | Reason                                             |
|-----------------|-------------|------------|--------|------------|----------------------------------------------------|
| <b>BARBADOS</b> |             |            |        |            |                                                    |
|                 |             | 25/06/1971 |        | 21/09/2004 | Broke his foot                                     |
|                 |             | 18/09/1974 |        | 04/08/2004 | Back injury                                        |
|                 |             | 04/08/1970 |        | 04/12/2004 | Hernia surgery                                     |
| <b>MEXICO</b>   |             |            |        |            |                                                    |
|                 |             | 06/05/1969 |        | 21/05/2004 | Chest pains, anxiety                               |
|                 |             | 04/11/1954 |        | 13/08/2004 | wants to go home                                   |
|                 |             | 28/05/1978 |        | 31/08/2004 | Complained of back/lung problems                   |
|                 |             | 24/12/1962 |        | 18/11/2004 | Tore muscle in shoulder but completed contract     |
|                 |             | 24/02/1963 |        | 02/07/2004 | Stomach problems                                   |
|                 |             | 25/01/1967 |        | 10/09/2004 | Contract completion as per employer                |
|                 |             | 08/09/1980 |        | 09/07/2004 | Back ache                                          |
|                 |             | 19/05/1977 |        | 24/08/2004 | Sore Groin                                         |
|                 |             | 18/09/1978 |        | 17/09/2004 | Sick, not working                                  |
|                 |             | 07/07/1959 |        | 08/04/2004 | Alcohol withdrawal                                 |
|                 |             | 10/03/1976 |        | 10/11/2004 | Slipped and fell, hurt his knee                    |
|                 |             | 04/09/1963 |        | 08/10/2004 | RBC Case/Broken Leg                                |
|                 |             | 04/06/1970 |        | 15/09/2004 | Back pain                                          |
|                 |             | 22/03/1969 |        | 17/09/2004 | Found on road unconscious, surgery for head trauma |
|                 |             | 10/03/1968 |        | 29/05/2004 | Kidney stones                                      |
|                 |             | 02/07/1960 |        | 18/05/2004 | Injured                                            |
|                 |             | 13/10/1966 |        | 06/08/2004 | knee surgery                                       |
|                 |             | 29/05/1967 |        | 23/07/2004 | Taken to Dr., nothing wrong, wants to go home      |
|                 |             | 25/03/1951 |        | 21/09/2004 | Wife is sick as per employer                       |
|                 |             | 21/02/1969 |        | 25/07/2004 | Worker is ill                                      |
|                 |             | 24/11/1949 |        | 02/07/2004 | Feeling sick                                       |
|                 |             | 27/03/1964 |        | 09/11/2004 | Blood clot in brain                                |
|                 |             | 19/02/1976 |        | 09/07/2004 | Wanted to go home                                  |
|                 |             | 26/04/1948 |        | 10/08/2004 | RBC Case/Cancer                                    |
|                 |             | 24/12/1961 |        | 29/06/2004 | Er. reports that he is causing trouble on farm     |
|                 |             | 13/12/1959 |        | 09/07/2004 | Feeling sick                                       |
|                 |             | 10/09/1971 |        | 30/07/2004 | Bone Tumor                                         |
|                 |             | 22/11/1955 |        | 20/07/2004 | Health problems                                    |
|                 |             | 12/05/1969 |        | 02/07/2004 | Feeling sick                                       |
|                 |             | 11/08/1977 |        | 22/04/2004 | Appendix burst, OK, but wanted to go home          |
|                 |             | 28/10/1978 |        | 02/07/2004 | Not working                                        |
|                 |             | 15/08/1959 |        | 10/09/2004 | Pre-existing back injury                           |
|                 |             | 11/11/1951 |        | 11/05/2004 | Throat infection                                   |
|                 |             | 08/12/1963 |        | 03/08/2004 | Eye surgery                                        |
|                 |             | 28/05/1967 |        | 03/08/2004 | worker is ill                                      |
|                 |             | 14/04/1972 |        | 13/09/2004 | Worker is ill                                      |
|                 |             | 20/12/1978 |        | 11/09/2004 | Pulled chest muscle                                |
|                 |             | 04/11/1964 |        | 19/10/2004 | Prostate infection                                 |
|                 |             | 18/04/1971 |        | 30/07/2004 | appendix operation- slow at working                |
|                 |             | 16/11/1961 |        | 23/07/2004 | Homesick as per er.                                |
|                 |             | 07/03/1978 |        | 14/05/2004 | Muscle strain                                      |
|                 |             | 24/10/1948 |        | 23/07/2004 | Feeling sick                                       |
|                 |             | 18/08/1963 |        | 07/05/2004 | Personal, wanted to go home                        |
|                 |             | 24/06/1980 |        | 30/09/2004 | Complained of backache, destroyed equipment        |
|                 |             | 18/06/1972 |        | 30/11/2004 | Ear Surgery                                        |

F.A.R.M.S.  
2004 Harvest System - Ontario  
Workers by Country and Repatriation Type  
Medical Repatriations as of 31/12/2004

Report: F39  
Date: 19/12/2011  
Time: 12:31 pm  
Page: 3

| Worker Name | Worker Code | Birth | S.I.N. | End Date | Reason |
|-------------|-------------|-------|--------|----------|--------|
|-------------|-------------|-------|--------|----------|--------|

MEXICO

25/11/1954  
19/10/1968

27/07/2004 III  
29/06/2004 Er. reports personal issues

Number of Workers: 90

F.A.R.M.S.  
 2005 Harvest System - Ontario  
 Workers by Country and Repatriation Type  
 Medical Repatriations as of 31/12/2005

Report: F39  
 Date: 19/12/2011  
 Time: 12:31 pm  
 Page: 1

| Worker Name     | Worker Code | Birth      | S.I.N. | End Date   | Reason                                          |
|-----------------|-------------|------------|--------|------------|-------------------------------------------------|
| TRINIDAD/TOBAGO |             | 12/08/1977 |        | 27/07/2005 | Requires surgery                                |
|                 |             | 04/09/1978 |        | 10/08/2005 | Can't do the work due to injury                 |
|                 |             | 28/07/1969 |        | 17/12/2005 | Hurt his back                                   |
|                 |             | 18/05/1967 |        | 10/08/2005 | Having trouble breathing                        |
|                 |             | 13/03/1976 |        | 07/10/2005 | Infection in elbow                              |
|                 |             | 25/10/1981 |        | 19/07/2005 | Worker is ill                                   |
| EAST CARIBBEAN  |             | 24/03/1966 |        | 30/08/2005 | Unsuitable as per HRSD                          |
|                 |             | 15/08/1966 |        | 12/12/2005 | Chest infection                                 |
|                 |             | 15/08/1971 |        | 07/04/2005 | Fell from truck, bruised ribs.                  |
| BARBADOS        |             | 02/09/1970 |        | 02/08/2005 | Doesn't want to work as per HRSD.               |
|                 |             | 24/06/1954 |        | 11/10/2005 | Had a cough, prescribed cough syrup by Dr.      |
|                 |             | 22/06/1968 |        | 26/04/2005 | Sore throat, wanted to see his own doctor       |
|                 |             | 10/02/1968 |        | 23/08/2005 | Quit working                                    |
| JAMAICA         |             | 05/10/1965 |        | 13/09/2005 | Cut his hand, couldn't work                     |
|                 |             | 18/10/1959 |        | 08/11/2005 | Hit his head on a tree branch in orchard        |
|                 |             | 18/04/1973 |        | 10/10/2005 | Sick in hospital                                |
|                 |             | 14/11/1955 |        | 20/09/2005 | Broken tibia, cast, unable to work              |
|                 |             | 04/04/1964 |        | 31/03/2005 | Hernia                                          |
|                 |             | 01/08/1962 |        | 09/09/2005 | Appendicitis                                    |
|                 |             | 17/07/1970 |        | 20/08/2005 | Fell on a wagon in May                          |
|                 |             | 13/04/1967 |        | 12/11/2005 | Broke his leg                                   |
|                 |             | 09/04/1953 |        | 20/09/2005 | Carpal tunnel surgery, unable to work           |
|                 |             | 19/08/1950 |        | 18/08/2005 | Liver/colon cancer; went home for chemotherapy  |
|                 |             | 04/07/1976 |        | 14/10/2005 | Hernia                                          |
|                 |             | 25/04/1972 |        | 16/08/2005 | Hurt his back                                   |
|                 |             | 05/05/1958 |        | 30/11/2005 | Operation on eye due to diabetes                |
|                 |             | 25/02/1971 |        | 11/11/2005 | Sore back                                       |
|                 |             | 30/04/1979 |        | 30/09/2005 | Muscle pain in back                             |
|                 |             | 08/05/1951 |        | 12/08/2005 | Has cancer, terminally ill                      |
|                 |             | 22/02/1980 |        | 23/08/2005 | Ulcers                                          |
|                 |             | 20/10/1965 |        | 13/09/2005 | High blood pressure, refused to work            |
|                 |             | 12/08/1952 |        | 10/08/2005 | Worker is ill                                   |
|                 |             | 03/07/1976 |        | 20/09/2005 | Had groin surgery, couldn't work for 8 weeks    |
|                 |             | 19/11/1954 |        | 02/11/2005 | Injured, worker's comp. case                    |
|                 |             | 07/07/1964 |        | 20/09/2005 | Wife is ill, also has glaucoma                  |
|                 |             | 30/04/1945 |        | 09/11/2005 | Gall bladder removed, finished contract         |
|                 |             | 24/05/1974 |        | 30/08/2005 | Sprained muscle in chest, wanted to go home     |
|                 |             | 08/01/1975 |        | 24/11/2005 | Admitted to hospital, psychotic                 |
|                 |             | 17/07/1971 |        | 23/06/2005 | Old hip and shoulder injury                     |
|                 |             | 01/07/1970 |        | 20/10/2005 | Hit by car while riding bike, seriously injured |

F.A.R.M.S.  
 2005 Harvest System - Ontario  
 Workers by Country and Repatriation Type  
 Medical Repatriations as of 31/12/2005

Report: F39  
 Date: 19/12/2011  
 Time: 12:31 pm  
 Page: 2

| Worker Name    | Worker Code | Birth      | S.I.N. | End Date   | Reason                                            |
|----------------|-------------|------------|--------|------------|---------------------------------------------------|
| <b>JAMAICA</b> |             |            |        |            |                                                   |
|                |             | 08/11/1973 |        | 01/11/2005 | Kidney stone operation, er. reports completion    |
|                |             | 18/01/1968 |        | 18/11/2005 | Cut right hand on a pulley on Nov.9               |
|                |             | 19/07/1976 |        | 10/11/2005 | Sore back                                         |
|                |             | 19/07/1957 |        | 02/11/2005 | Hernia                                            |
|                |             | 05/08/1981 |        | 25/11/2005 | Pinched foot in bin lifter                        |
| <b>MEXICO</b>  |             |            |        |            |                                                   |
|                |             | 24/06/1959 |        | 27/04/2005 | Bad back                                          |
|                |             | 14/01/1959 |        | 04/11/2005 | Cancer in his mouth                               |
|                |             | 13/07/1978 |        | 27/05/2005 | Chest pain                                        |
|                |             | 12/09/1960 |        | 04/11/2005 | Cut left arm in work related accident             |
|                |             | 10/08/1972 |        | 24/03/2005 | Kidney Problem-Sought Refugee Status              |
|                |             | 24/09/1974 |        | 17/08/2005 | Injured finger                                    |
|                |             | 28/09/1974 |        | 07/09/2005 | Pulled tendon in wrist                            |
|                |             | 04/12/1977 |        | 08/10/2005 | Complained of not feeling well, Dr. found nothing |
|                |             | 03/04/1967 |        | 30/08/2005 | Existing medical condition, worker didn't specify |
|                |             | 08/06/1960 |        | 29/04/2005 | Ear hurts, wants to go home                       |
|                |             | 17/08/1966 |        | 14/06/2005 | Worker is sick                                    |
|                |             | 04/11/1967 |        | 16/09/2005 | Hernia operation                                  |
|                |             | 27/06/1964 |        | 15/07/2005 | Heart condition, bought own ticket                |
|                |             | 25/04/1977 |        | 10/06/2005 | Not feeling well                                  |
|                |             | 08/09/1977 |        | 14/05/2005 | Worker vomiting, taken to Dr., wants to go home   |
|                |             | 02/12/1977 |        | 08/07/2005 | Worker is ill                                     |
|                |             | 25/04/1981 |        | 03/06/2005 | Stomach operation                                 |
|                |             | 08/03/1962 |        | 30/08/2005 | Groin problem                                     |
|                |             | 02/08/1977 |        | 21/10/2005 | Health problems                                   |
|                |             | 03/12/1972 |        | 30/08/2005 | Stomach problems                                  |
|                |             | 19/04/1959 |        | 30/08/2005 | Knee problem                                      |
|                |             | 23/10/1973 |        | 28/10/2005 | Lost 2 toes in accident                           |
|                |             | 30/10/1959 |        | 17/06/2005 | Worker is not well                                |
|                |             | 28/09/1962 |        | 16/09/2005 | Acid reflux, wanted to go home                    |
|                |             | 10/08/1980 |        | 12/07/2005 | Injured his back                                  |
|                |             | 20/01/1976 |        | 02/09/2005 | Had surgery on heel, needs wheelchair assistance  |
|                |             | 28/09/1973 |        | 23/08/2005 | Pulled muscle in back, wants to go home           |
|                |             | 07/04/1970 |        | 13/10/2005 | Finger cut off in work related accident           |
|                |             | 22/02/1957 |        | 05/10/2005 | Fell out of an apple tree                         |
|                |             | 24/10/1975 |        | 19/04/2005 | Had surgery                                       |
|                |             | 10/09/1969 |        | 21/10/2005 | Hurt his knee                                     |
|                |             | 14/05/1977 |        | 07/04/2005 | Acid reflux, wanted to go home                    |

Number of Workers: 77

F.A.R.M.S.  
 2006 Harvest System - Ontario  
 Workers by Country and Repatriation Type  
 Medical Repatriations as of 31/12/2006

Report: F39  
 Date: 19/12/2011  
 Time: 12:32 pm  
 Page: 1

| Worker Name     | Worker Code | Birth      | S.I.N.     | End Date                                       | Reason                                   |
|-----------------|-------------|------------|------------|------------------------------------------------|------------------------------------------|
| EAST CARIBBEAN  |             |            |            |                                                |                                          |
| TRINIDAD/TOBAGO |             | 10/02/1967 |            | 16/03/2006                                     | Homesick, psychological                  |
|                 |             | 15/12/1975 |            | 01/08/2006                                     | Feeling sick                             |
| MEXICO          |             | 15/12/1981 |            | 21/09/2006                                     | Injured back, worker decided to go home. |
|                 |             | 12/08/1977 |            | 18/07/2006                                     | Unfit to Work                            |
|                 |             | 28/01/1973 |            | 11/05/2006                                     | Tore tendon in shoulder                  |
|                 |             | 02/12/1983 |            | 18/07/2006                                     | Unfit to Work, with back problems        |
|                 |             | 18/01/1982 |            | 18/07/2006                                     | Unfit to work, lung problems             |
|                 |             | 25/12/1955 |            | 05/09/2006                                     | Tobacco Poisoning.                       |
|                 |             | 22/11/1976 |            | 21/08/2006                                     | Injured himself and decided to go home.  |
|                 |             | 07/01/1980 |            | 26/06/2006                                     | Didn't feel well                         |
|                 |             | 10/03/1965 |            | 26/06/2006                                     | Stomach ache                             |
|                 |             | 05/10/1959 |            | 12/05/2006                                     | Back problem                             |
|                 | 13/04/1971  |            | 04/05/2006 | feeling sick                                   |                                          |
|                 | 21/01/1965  |            | 26/05/2006 | Broke his leg                                  |                                          |
|                 | 15/10/1970  |            | 08/09/2006 | Has Bell's Palsy                               |                                          |
|                 | 05/02/1975  |            | 26/07/2006 | worker sick - doctor found nothing wrong       |                                          |
|                 | 17/10/1967  |            | 20/07/2006 | Fell off bike, broke clavicle                  |                                          |
|                 | 27/09/1945  |            | 25/04/2006 | Sick                                           |                                          |
|                 | 24/12/1976  |            | 22/08/2006 | Throat virus                                   |                                          |
|                 | 19/08/1980  |            | 28/12/2006 | Broken Leg, Booked Outside CanAg               |                                          |
|                 | 02/04/1977  |            | 19/09/2006 | In hospital, Worker did not specify.           |                                          |
|                 | 22/12/1971  |            | 30/03/2006 | Wanted to go home                              |                                          |
|                 | 11/07/1970  |            | 06/06/2006 | Ear problem                                    |                                          |
|                 | 27/09/1954  |            | 24/01/2006 | Has cancer                                     |                                          |
|                 | 10/02/1967  |            | 18/06/2006 | Headaches                                      |                                          |
|                 | 19/08/1962  |            | 19/10/2006 | Worker had kidney stones and lung problems.    |                                          |
|                 | 29/11/1972  |            | 26/06/2006 | Facial swelling                                |                                          |
|                 | 12/05/1966  |            | 21/10/2006 | Worker was homesick.                           |                                          |
|                 | 15/11/1977  |            | 04/05/2006 | Health problems                                |                                          |
|                 | 05/07/1967  |            | 18/08/2006 | Bicycle accident, head injury                  |                                          |
|                 | 29/08/1963  |            | 18/08/2006 | Stomach hurts                                  |                                          |
|                 | 22/10/1969  |            | 16/03/2006 | Worker is ill                                  |                                          |
|                 | 11/01/1971  |            | 26/06/2006 | Claimed he didn't feel well                    |                                          |
|                 | 11/03/1976  |            | 13/06/2006 | left leg was hurting due to previous operation |                                          |
|                 | 14/08/1978  |            | 20/06/2006 | Bad allergies                                  |                                          |
|                 | 29/09/1971  |            | 23/12/2006 | RBC Purchased Plane Ticket                     |                                          |
|                 | 24/12/1971  |            | 12/10/2006 | Liver problem-booked Outside CanAg             |                                          |
|                 | 03/09/1957  |            | 08/09/2006 | Feeling Sick                                   |                                          |
|                 | 06/12/1963  |            | 20/06/2006 | Bad allergies                                  |                                          |
|                 | 20/12/1965  |            | 22/11/2006 | Worker had appendicitis.                       |                                          |
|                 | 15/04/1974  |            | 31/08/2006 | Allergies                                      |                                          |
|                 | 28/07/1955  |            | 13/06/2006 | Wanted to go home as per Canag Travel          |                                          |
|                 | 31/08/1978  |            | 01/05/2006 | Sick                                           |                                          |
|                 | 26/01/1964  |            | 16/03/2006 | Wants to go home                               |                                          |

**F.A.R.M.S.**  
**2006 Harvest System - Ontario**  
**Workers by Country and Repatriation Type**  
**Medical Repatriations as of 31/12/2006**

Report: F39  
 Date: 19/12/2011  
 Time: 12:32 pm  
 Page: 2

| Worker Name | Worker Code | Birth      | S.I.N. | End Date   | Reason                                         |
|-------------|-------------|------------|--------|------------|------------------------------------------------|
| JAMAICA     |             | 22/07/1969 |        | 23/11/2006 | Complained of a sore thumb.                    |
|             |             | 26/04/1976 |        | 26/10/2006 | Injured finger and decided to go home.         |
|             |             | 15/04/1970 |        | 15/09/2006 | Complained of pain. DR. found nothing wrong.   |
|             |             | 26/05/1975 |        | 12/06/2006 | Motor Vehicle Accident                         |
|             |             | 25/12/1963 |        | 06/11/2006 | Worker twisted knee.                           |
|             |             | 04/01/1963 |        | 14/11/2006 | Worker had a broken leg.                       |
|             |             | 27/05/1983 |        | 29/09/2006 | Mentally disturbed, carrying a knife           |
|             |             | 16/11/1973 |        | 15/09/2006 | Complained of sore back.                       |
|             |             | 04/12/1971 |        | 19/07/2006 | Back Injury                                    |
|             |             | 28/05/1974 |        | 01/09/2006 | Fell down stairs, claimed hurt back as per er. |
|             |             | 15/10/1965 |        | 12/10/2006 | Fell and hurt his thigh                        |
|             |             | 17/12/1971 |        | 05/10/2006 | Diagnosed with Plebitis.                       |
|             |             | 08/02/1962 |        | 03/11/2006 | Sent home for emotional issues.                |
|             |             | 03/06/1974 |        | 25/07/2006 | Injured on farm                                |
|             |             | 01/08/1980 |        | 22/09/2006 | Worker has a hernia.                           |
|             |             | 03/08/1963 |        | 21/09/2006 | Complained of sore back.                       |
|             |             | 14/05/1977 |        | 15/11/2006 | Broke his foot outside of work.                |
|             |             | 15/06/1966 |        | 21/09/2006 | Injured Ear on Machine.                        |
|             |             | 13/05/1972 |        | 24/08/2006 | INJURED ON FARM                                |
|             |             | 17/06/1974 |        | 31/08/2006 | Injured - WSIB                                 |
|             |             | 09/05/1960 |        | 07/11/2006 | Worker had a strained back.                    |
|             |             | 04/02/1978 |        | 28/06/2006 | Claimed to be sick, no findings per doctor     |
|             |             | 27/09/1958 |        | 31/10/2006 | Worker has a bleeding ulcer.                   |

Number of Workers: 67



**F.A.R.M.S.**  
**2007 Harvest System - Ontario**  
**Workers by Country and Repatriation Type**  
**Medical Repatriations as of 31/12/2007**

Report: F39  
 Date: 19/12/2011  
 Time: 12:33 pm  
 Page: 1

| Worker Name     | Worker Code | Birth      | S.I.N. | End Date   | Reason                                   |
|-----------------|-------------|------------|--------|------------|------------------------------------------|
| TRINIDAD/TOBAGO |             | 02/08/1968 |        | 31/08/2007 | Facial area                              |
| EAST CARIBBEAN  |             | 18/10/1975 |        | 17/10/2007 | Hurt his finger                          |
| JAMAICA         |             | 05/02/1978 |        | 30/08/2007 | Problem with feet                        |
|                 |             | 15/10/1962 |        | 10/08/2007 | Cancer all over his body                 |
|                 |             | 20/04/1962 |        | 27/04/2007 | Severe Head Pain                         |
|                 |             | 15/12/1970 |        | 24/03/2007 | hurt back                                |
|                 |             | 27/08/1976 |        | 15/05/2007 | Had abdominal surgery                    |
|                 |             | 02/08/1958 |        | 14/09/2007 | Worker ill                               |
|                 |             | 12/05/1954 |        | 23/05/2007 | Heart Failure-Travelled by Air Ambulance |
|                 |             | 27/03/1970 |        | 02/10/2007 | Worker's compensation                    |
|                 |             | 08/08/1982 |        | 16/10/2007 | W/C                                      |
|                 |             | 30/01/1975 |        | 28/09/2007 |                                          |
|                 |             | 12/09/1970 |        | 22/06/2007 | Worker feeling sick                      |
|                 |             | 23/10/1959 |        | 20/06/2007 | Worker is ill                            |
|                 |             | 23/08/1960 |        | 10/10/2007 | Worker's compensation                    |
|                 |             | 19/07/1982 |        | 17/08/2007 | Complaints of backache                   |
|                 |             | 13/05/1971 |        | 05/10/2007 | Workers compensation                     |
|                 |             | 18/12/1982 |        | 18/07/2007 | Sore back                                |
| MEXICO          |             | 12/10/1972 |        | 27/07/2007 | Homesick                                 |
|                 |             | 12/12/1969 |        | 08/06/2007 | Sore back, needed rest, may return       |
|                 |             | 27/11/1970 |        | 15/05/2007 | Wrist Problem                            |
|                 |             | 31/05/1980 |        | 12/08/2007 | Wisdom tooth problems                    |
|                 |             | 24/12/1966 |        | 20/07/2007 | Chronic wrist problem                    |
|                 |             | 03/05/1963 |        | 25/05/2007 | Broken Wrist, & Sore Back                |
|                 |             | 21/11/1972 |        | 30/07/2007 | Back problems                            |
|                 |             | 08/08/1968 |        | 28/08/2007 | Disagreement with management             |
|                 |             | 01/07/1965 |        | 01/06/2007 | Mentally ill                             |
|                 |             | 20/10/1979 |        | 30/05/2007 | Complained about back & kidney problems  |
|                 |             | 24/04/1976 |        | 19/06/2007 | Personal reasons as per employer         |
|                 |             | 23/06/1964 |        | 09/05/2007 | Worker has Hernia                        |
|                 |             | 08/03/1961 |        | 08/08/2007 | Personal issue                           |
|                 |             | 22/09/1962 |        | 03/08/2007 | Going blind in one eye                   |
|                 |             | 22/02/1985 |        | 08/03/2007 | Worker is sick                           |
|                 |             | 07/07/1968 |        | 19/06/2007 | Worker is ill, not happy                 |
|                 |             | 02/06/1963 |        | 13/04/2007 | Dental Problem                           |
|                 |             | 30/10/1971 |        | 31/08/2007 | Worker wants to go home                  |
|                 |             | 13/02/1973 |        | 17/07/2007 | Testicle infection                       |
|                 |             | 23/01/1975 |        | 04/12/2007 | Will not be returning to Mexico          |
|                 |             | 23/07/1964 |        | 06/07/2007 | Hurt his back                            |
|                 |             | 23/12/1962 |        | 31/08/2007 | INJURED                                  |
|                 |             | 17/07/1975 |        | 29/06/2007 | Worker is ill                            |
|                 |             | 27/07/1974 |        | 19/06/2007 | Worker is feeling sick                   |
|                 |             | 04/05/1967 |        | 03/08/2007 | Rash                                     |
|                 |             | 16/02/1974 |        | 25/05/2007 | Had hernia operation                     |
|                 |             | 08/10/1970 |        | 15/05/2007 | Unable to Walk-Back Problem              |
|                 |             | 16/05/1974 |        | 07/04/2007 | Multiple Headaches                       |
|                 |             | 31/07/1973 |        | 17/08/2007 | Injured                                  |
|                 |             | 12/10/1971 |        | 08/05/2007 | Worker has rashes on thighs              |

F.A.R.M.S.  
2007 Harvest System - Ontario  
Workers by Country and Repatriation Type  
Medical Repatriations as of 31/12/2007

Report: F39  
Date: 19/12/2011  
Time: 12:33 pm  
Page: 2

| Worker Name | Worker Code | Birth      | S.I.N. | End Date   | Reason                          |
|-------------|-------------|------------|--------|------------|---------------------------------|
| MEXICO      |             |            |        |            |                                 |
|             |             | 21/06/1969 |        | 22/05/2007 | Worker Had Gall Bladder surgery |
|             |             | 23/08/1967 |        | 10/08/2007 | Pregnant                        |
|             |             | 18/11/1971 |        | 24/08/2007 | Eye infection                   |

Number of Workers: 51

**F.A.R.M.S.**  
**2008 Harvest System - Ontario**  
**Workers by Country and Repatriation Type**  
**Medical Repatriations as of 31/12/2008**

Report: F39  
 Date: 19/12/2011  
 Time: 12:34 pm  
 Page: 1

| Worker Name            | Worker Code | Birth      | S.I.N. | End Date   | Reason                                               |
|------------------------|-------------|------------|--------|------------|------------------------------------------------------|
| <b>EAST CARIBBEAN</b>  |             |            |        |            |                                                      |
|                        |             | 01/10/1963 |        | 02/09/2008 | pre-existing Heart Attack was no condition to work   |
|                        |             | 04/05/1970 |        | 29/09/2008 | everytime worker worked in G.H he felt nauseous      |
| <b>TRINIDAD/TOBAGO</b> |             |            |        |            |                                                      |
|                        |             | 08/12/1964 |        | 16/09/2008 | back problem                                         |
|                        |             | 08/08/1966 |        | 08/05/2008 | Weight loss, low energy                              |
|                        |             | 23/05/1975 |        | 02/10/2008 | Just wanted to go home as per employer               |
|                        |             | 21/12/1968 |        | 30/11/2008 | worker was in hospital with Tuberculosis             |
| <b>JAMAICA</b>         |             |            |        |            |                                                      |
|                        |             | 03/03/1979 |        | 20/06/2008 | Hurt his hand                                        |
|                        |             | 22/08/1968 |        | 29/08/2008 | had operation (appendix) and wanted to go home       |
|                        |             | 11/12/1944 |        | 17/11/2008 | Diabetes, High Blood Pressure, Congestive Heart Fail |
|                        |             | 09/09/1961 |        | 14/11/2008 |                                                      |
|                        |             | 21/01/1978 |        | 02/09/2008 | as per Bruce Boyd worker quit                        |
|                        |             | 25/02/1963 |        | 12/09/2008 | due to seizures                                      |
|                        |             | 08/03/1971 |        | 16/10/2008 | back problems                                        |
|                        |             | 05/05/1979 |        | 23/08/2008 | complaining about having a sore back                 |
|                        |             | 28/06/1972 |        | 18/11/2008 | cut tip of finger in machine, was already booked     |
|                        |             | 24/03/1973 |        | 18/10/2008 | due to back pain                                     |
|                        |             | 02/03/1959 |        | 21/10/2008 | complaining about head aches - diagnose with cancer  |
|                        |             | 11/03/1973 |        | 27/10/2008 | 1st time to doc's was for cold, 2nd time back        |
|                        |             | 09/08/1968 |        | 03/06/2008 | was diagnosed with Cancer                            |
|                        |             | 25/05/1973 |        | 15/07/2008 | foot injury                                          |
|                        |             | 10/10/1961 |        | 5/04/2008  | had different excuses for leg injury                 |
|                        |             | 24/08/1973 |        | 22/11/2008 | psychological reasons                                |
|                        |             | 06/06/1962 |        | 14/11/2008 |                                                      |
|                        |             | 13/01/1979 |        | 07/10/2008 | pulled a muscle                                      |
|                        |             | 26/10/1963 |        | 16/10/2008 | personal medical                                     |
|                        |             | 04/10/1971 |        | 28/10/2008 | had a hernia operation a week prior to departing     |
|                        |             | 25/07/1974 |        | 25/06/2008 | due to arm injury                                    |
|                        |             | 08/09/1972 |        | 04/12/2008 |                                                      |
|                        |             | 18/12/1968 |        | 12/12/2008 | worker had a back problem                            |
|                        |             | 24/09/1984 |        | 08/10/2008 | pulled a muscle                                      |
|                        |             | 06/06/1961 |        | 29/08/2008 | had MRI on leg - was told to stay off                |
|                        |             | 17/03/1976 |        | 26/08/2008 | back problems was given lighter duties and refused   |
| <b>MEXICO</b>          |             |            |        |            |                                                      |
|                        |             | 06/03/1964 |        | 15/12/2008 | Finger amputated, will be sent home by RBC           |
|                        |             | 23/08/1975 |        | 30/05/2008 | Employer would not specify                           |
|                        |             | 24/12/1962 |        | 10/07/2008 | hernia                                               |
|                        |             | 25/09/1983 |        | 11/07/2008 | ingrown toe nail                                     |
|                        |             | 03/11/1976 |        | 15/08/2008 | hernia                                               |

**F.A.R.M.S.**  
**2008 Harvest System - Ontario**  
**Workers by Country and Repatriation Type**  
**Medical Repatriations as of 31/12/2008**

Report: F39  
 Date: 19/12/2011  
 Time: 12:34 pm  
 Page: 2

| Worker Name | Worker Code | Birth      | S.I.N. | End Date   | Reason                                             |
|-------------|-------------|------------|--------|------------|----------------------------------------------------|
| MEXICO      |             | 21/12/1942 |        | 05/08/2008 | Brain stroke, swollen esophagus                    |
|             |             | 13/01/1975 |        | 13/09/2008 | in hospital since Aug 30 may have lymphatic cancer |
|             |             | 21/12/1963 |        | 13/06/2008 | Constant headaches, refused medical treatment      |
|             |             | 23/07/1965 |        | 10/07/2008 | Sent home by RBC Insurance                         |
|             |             | 13/11/1976 |        | 20/06/2008 | 24mar09 - AWOL reversal as per Mex Con.            |
|             |             | 21/08/1974 |        | 16/04/2008 | depressed, flu like symptoms                       |
|             |             | 06/02/1974 |        | 13/06/2008 | stomach problems                                   |
|             |             | 28/08/1957 |        | 22/07/2008 | Sick, tested but no cause determined               |
|             |             | 30/08/1962 |        | 28/08/2008 | Injured                                            |
|             |             | 06/07/1981 |        | 08/08/2008 | had appendix out decided to go home                |
|             |             | 19/12/1985 |        | 07/08/2008 | Herniated testicle, refused treatment in Canada    |
|             |             | 03/02/1976 |        | 17/08/2008 | Allergies                                          |
|             |             | 28/01/1954 |        | 17/06/2008 | Bad rash worker wanted to go home.                 |
|             |             | 04/07/1964 |        | 24/08/2008 | Heart problems                                     |
|             |             | 24/09/1964 |        | 17/06/2008 | worker refused medical treatment in Canada         |
|             |             | 26/12/1964 |        | 15/12/2008 | Arm partly severed and reattached-leaving Jan-09   |
|             |             | 29/08/1968 |        | 26/06/2008 | extremely ill, rbc pd for flight outside canag     |
|             |             | 25/12/1972 |        | 25/07/2008 | Lower back and leg problems                        |
|             |             | 13/05/1971 |        | 08/08/2008 | Had a baby                                         |
|             |             | 29/02/1976 |        | 05/09/2008 | suffering from anxiety and not sleeping            |
|             |             | 16/05/1974 |        | 17/06/2008 | Kept having headaches                              |
|             |             | 02/09/1965 |        | 17/07/2008 | 7/8 months pregnant on arrival                     |
|             |             | 23/08/1976 |        | 27/05/2008 | not recovering well after removal of appendix      |
|             |             | 20/07/1981 |        | 15/08/2008 | worker refusing medical attention for foot         |
|             |             | 14/08/1983 |        | 08/08/2008 | Mentally ill, Consulate sent home outside Canag    |
|             |             | 21/03/1981 |        | 09/11/2008 |                                                    |
|             |             | 25/03/1970 |        | 29/07/2008 | Worker is ill                                      |
|             |             | 16/11/1961 |        | 31/07/2008 | refused medical treatment for rash                 |
|             |             | 19/11/1967 |        | 13/06/2008 | Feeling ill                                        |
|             |             | 04/10/1972 |        | 25/07/2008 | stomach pains booked outside canag                 |
|             |             | 16/10/1947 |        | 24/10/2008 | Stomach surgery; went home via RBC insurance       |

Number of Workers: 68

41

F.A.R.M.S.  
 2009 Harvest System - Ontario  
 Workers by Country and Repatriation Type  
 Medical Repatriations as of 31/12/2009

Report: F39  
 Date: 19/12/2011  
 Time: 12:34 pm  
 Page: 1

| Worker Name            | Worker Code | Birth      | S.I.N. | End Date   | Reason                                             |
|------------------------|-------------|------------|--------|------------|----------------------------------------------------|
| <b>TRINIDAD/TOBAGO</b> |             |            |        |            |                                                    |
|                        |             | 21/11/1977 |        | 24/02/2009 | worker not feeling well                            |
|                        |             | 25/11/1977 |        | 15/12/2009 | diagnosed with massive renal failure               |
|                        |             | 04/09/1981 |        | 07/10/2009 | worker has allergies                               |
|                        |             | 26/02/1988 |        | 06/08/2009 | worker broke his finger                            |
|                        |             | 29/01/1975 |        | 25/04/2009 | worker is ill                                      |
|                        |             | 16/02/1956 |        | 25/09/2009 | had an asthma attack                               |
| <b>MEXICO</b>          |             |            |        |            |                                                    |
|                        |             | 24/02/1965 |        | 07/10/2009 | Worker sick                                        |
|                        |             | 10/09/1961 |        | 29/09/2009 | had surgery                                        |
|                        |             | 10/02/1971 |        | 07/08/2009 | worker borderline diabetic                         |
|                        |             | 07/08/1975 |        | 31/07/2009 | Worker thinks he is sick                           |
|                        |             | 26/03/1974 |        | 12/11/2009 | Medical issue in Mexico                            |
|                        |             | 07/08/1960 |        | 11/09/2009 | injured, can't work                                |
|                        |             | 16/06/1959 |        | 23/07/2009 | Back was hurting                                   |
|                        |             | 07/03/1974 |        | 28/10/2009 | Worker has cancer                                  |
|                        |             | 19/08/1974 |        | 21/10/2009 | Injured finger (cut tip)                           |
|                        |             | 04/08/1973 |        | 09/10/2009 | Back problems                                      |
|                        |             | 17/06/1963 |        | 15/10/2009 | Fell off ladder and broke 3 ribs                   |
|                        |             | 15/05/1963 |        | 11/07/2009 | Pre-existing perforated bowel, sent home by RSC    |
|                        |             | 16/10/1971 |        | 28/08/2009 | Health issues                                      |
|                        |             | 30/09/1981 |        | 05/06/2009 | Worker ill                                         |
|                        |             | 21/04/1960 |        | 12/06/2009 | worker is ill                                      |
|                        |             | 28/03/1957 |        | 06/08/2009 | Mental problems                                    |
|                        |             | 27/10/1978 |        | 29/10/2009 | Back problems                                      |
|                        |             | 19/10/1977 |        | 16/12/2009 | Had surgery, stayed 1 month longer                 |
|                        |             | 09/09/1960 |        | 10/03/2009 | Too large in stature to do job                     |
|                        |             | 04/10/1964 |        | 07/07/2009 | back pain                                          |
|                        |             | 16/05/1974 |        | 19/03/2009 | Depression                                         |
|                        |             | 17/04/1986 |        | 15/09/2009 | Seizure                                            |
|                        |             | 13/11/1974 |        | 25/09/2009 | back problems                                      |
|                        |             | 28/08/1961 |        | 18/09/2009 | Worker would not specify                           |
| <b>JAMAICA</b>         |             |            |        |            |                                                    |
|                        |             | 04/02/1978 |        | 22/10/2009 | broke his arm                                      |
|                        |             | 17/01/1963 |        | 15/12/2009 | will remain in Canada until April 2010             |
|                        |             | 21/02/1979 |        | 18/09/2009 | Mental problems                                    |
|                        |             | 15/01/1968 |        | 06/10/2009 | had a ultra sound 2 days before going home -Hernia |
|                        |             | 18/05/1987 |        | 11/09/2009 | inflammation                                       |
|                        |             | 17/01/1973 |        | 06/10/2009 | had a emergency operation for appendix             |
|                        |             | 12/08/1964 |        | 25/09/2009 | worker fractured his hand                          |
|                        |             | 08/03/1980 |        | 14/10/2009 | fell out of the truck and hurt his hand            |
|                        |             | 27/01/1961 |        | 14/10/2009 | Contract Completion - Kidney Stone                 |
|                        |             | 25/09/1971 |        | 20/06/2009 | worker not feeling well                            |
|                        |             | 09/02/1965 |        | 20/11/2009 | worker injured himself on the job                  |
|                        |             | 15/04/1972 |        | 11/09/2009 | worker injured himself while at work               |
|                        |             | 06/09/1972 |        | 15/10/2009 | Arthroscopy (knee surgery)                         |
|                        |             | 02/07/1986 |        | 23/09/2009 | pulled muscle                                      |

F.A.R.M.S.  
2009 Harvest System - Ontario  
Workers by Country and Repatriation Type  
Medical Repatriations as of 31/12/2009

Report: F39  
Date: 19/12/2011  
Time: 12:34 pm  
Page: 2

| Worker Name    | Worker Code | Birth      | S.I.N. | End Date   | Reason                                             |
|----------------|-------------|------------|--------|------------|----------------------------------------------------|
| JAMAICA        |             | 29/05/1967 |        | 18/08/2009 | worker had surgery - unable to work                |
|                |             | 02/01/1958 |        | 15/05/2009 | pre-existing wound on leg will take months to heal |
|                |             | 01/04/1966 |        | 04/09/2009 | worker injured                                     |
|                |             | 26/07/1968 |        | 30/09/2009 | injured at work had to have surgery                |
|                |             | 26/09/1962 |        | 30/09/2009 | went to doctor due to swollen finger               |
|                |             | 10/09/1971 |        | 27/11/2009 | as per employer worker went home as contract comp. |
|                |             | 19/05/1952 |        | 14/10/2009 | stroke                                             |
|                |             | 06/04/1973 |        | 07/10/2009 | ill                                                |
|                |             | 10/11/1980 |        | 03/09/2009 | having trouble sleeping                            |
|                |             | 12/02/1967 |        | 30/04/2009 | had a Hernia operation                             |
| EAST CARIBBEAN |             | 28/07/1975 |        | 09/04/2009 | worker not able to do heavy lifting                |
|                |             | 10/11/1972 |        | 27/11/2009 | injured his wrist on the job                       |
|                |             |            |        |            |                                                    |

Number of Workers: 56

**F.A.R.M.S.**  
**2010 Harvest System - Ontario**  
**Workers by Country and Repatriation Type**  
**Medical Repatriations as of 31/12/2010**

Report: F39  
 Date: 19/12/2011  
 Time: 12:35 pm  
 Page: 1

| Worker Name     | Worker Code | Birth      | S.I.N.     | End Date                                       | Reason                                           |
|-----------------|-------------|------------|------------|------------------------------------------------|--------------------------------------------------|
| EAST CARIBBEAN  |             | 17/04/1954 |            | 31/07/2010                                     | injured his fingers                              |
|                 |             | 22/04/1967 |            | 16/05/2010                                     | went home due to stomach problems                |
|                 |             | 02/10/1978 |            | 28/08/2010                                     | pre-existing back problem                        |
|                 |             | 18/07/1975 |            | 10/04/2010                                     | involved in a accident                           |
| TRINIDAD/TOBAGO |             | 26/02/1967 |            | 06/08/2010                                     | tobacco poisoning                                |
|                 |             | 10/06/1970 |            | 30/04/2010                                     | unable to work due to very bad back pain         |
|                 |             | 25/06/1986 |            | 29/09/2010                                     | went to doc re back pain - wanted to go home     |
| MEXICO          |             | 11/10/1952 |            | 06/08/2010                                     | not feeling well                                 |
|                 |             | 25/12/1960 |            | 14/05/2010                                     | Worker is ill                                    |
|                 |             | 31/10/1954 |            | 31/08/2010                                     | booked through RBC- Cancer                       |
|                 |             | 28/11/1982 |            | 02/07/2010                                     | not feeling well                                 |
|                 |             | 28/02/1959 |            | 05/09/2010                                     | done through RBC.                                |
|                 |             | 14/02/1958 |            | 04/05/2010                                     | Worker has back pain                             |
|                 |             | 13/04/1974 |            | 16/09/2010                                     | Undisclosed medical condition                    |
|                 |             | 18/02/1959 |            | 05/09/2010                                     | home sick, as per employer.                      |
|                 |             | 25/05/1975 |            | 23/12/2010                                     | leg amputation                                   |
|                 |             | 26/01/1980 |            | 02/10/2010                                     | booked through RBC ins. worker had back pain.    |
|                 |             | 21/04/1979 |            | 30/09/2010                                     | booked through RBC worker was ill.               |
|                 |             | 04/09/1977 |            | 26/03/2010                                     | Worker has problem with eyes                     |
|                 |             | 11/02/1973 |            | 26/08/2010                                     | worker sick.                                     |
|                 |             | 13/08/1957 |            | 02/10/2010                                     | breathing issues.                                |
|                 | 24/09/1976  |            | 29/09/2010 | medical                                        |                                                  |
| JAMAICA         |             | 30/10/1964 |            | 28/10/2010                                     | had a pre existing medical condition.            |
|                 |             | 12/12/1981 |            |                                                | had a pre                                        |
|                 |             | 29/07/1973 |            | 13/08/2010                                     | as per employer refuse to work                   |
|                 |             | 27/10/1967 |            | 18/05/2010                                     | as per Employer went home as contract completion |
|                 |             | 22/10/1963 |            | 17/12/2010                                     | He had an open sore on leg                       |
|                 |             | 17/04/1965 |            | 03/09/2010                                     | worker is ill                                    |
|                 |             | 23/05/1973 |            | 04/08/2010                                     | worker quit                                      |
|                 |             | 27/03/1965 |            | 28/09/2010                                     | injured on the job                               |
|                 |             | 15/07/1972 |            | 10/09/2010                                     | as per Canag contract comp.                      |
|                 |             | 16/04/1983 |            | 24/09/2010                                     | Hemia operation.                                 |
|                 |             | 04/07/1987 |            | 11/11/2010                                     | went home on crutches- broken foot               |
|                 |             | 15/09/1968 |            | 25/08/2010                                     | worker was ill                                   |
|                 |             | 05/11/1975 |            | 20/07/2010                                     | worker needs assistance injured                  |
|                 |             | 07/01/1962 |            | 25/08/2010                                     | worker was ill                                   |
|                 | 13/06/1973  |            | 20/09/2010 | sick - complaining about chest                 |                                                  |
|                 | 08/07/1964  |            | 19/11/2010 | was on the tractor and injured his eye on cage |                                                  |
|                 |             |            | 12/12/2010 | cut his hand.(during working hours)            |                                                  |

Number of Workers: 38

**F.A.R.M.S.**  
**2011 Harvest System - Ontario**  
**Workers by Country and Repatriation Type**  
**Medical Repatriations as of 19/12/2011**

Report: F39  
Date: 19/12/2011  
Time: 12:36 pm  
Page: 1

| Worker Name     | Worker Code | Birth      | S.I.N. | End Date   | Reason                                                            |
|-----------------|-------------|------------|--------|------------|-------------------------------------------------------------------|
| TRINIDAD/TOBAGO |             | 18/10/1979 |        | 16/09/2011 | injured his hand while working                                    |
|                 |             | 13/07/1988 |        | 21/09/2011 | injured his hand                                                  |
|                 |             | 25/04/1975 |        | 20/07/2011 | worker ill, wants to go home<br>injured his back while showering. |
|                 |             | 11/02/1978 |        | 31/08/2011 | worker has medical issue                                          |
|                 |             | 17/02/1987 |        | 28/09/2011 | was injured while at work and wanted to go home                   |
| EAST CARIBBEAN  |             | 17/04/1980 |        | 03/09/2011 | Worker wants to go home                                           |
|                 |             | 11/06/1983 |        | 09/09/2011 | Hernia and wanted to go home                                      |
|                 |             | 23/01/1974 |        | 06/04/2011 | not feeling well                                                  |
| BARBADOS        |             | 02/06/1977 |        | 18/03/2011 | worker is ill                                                     |
|                 |             | 11/11/1989 |        | 25/06/2011 | problem on farm as per Canag                                      |
| MEXICO          |             | 1/06/1979  |        | 13/09/2011 | Lung infection                                                    |
|                 |             | 12/12/1958 |        | 03/03/2011 | Never recovered from kidney surgery a month ago                   |
| JAMAICA         |             | 01/06/1979 |        | 21/04/2011 | Surgery on arm                                                    |
|                 |             | 10/07/1984 |        | 28/03/2011 | Needs surgery on hernia                                           |
|                 |             | 25/07/1982 |        | 12/08/2011 | Feeling sick. Unhappy with medical prognosis                      |
|                 |             | 19/12/1951 |        | 08/09/2011 | Health Issues                                                     |
|                 |             | 07/08/1965 |        | 06/10/2011 | Worker is ill                                                     |
|                 |             | 20/03/1977 |        | 12/04/2011 | Dental pain, dizziness from meds                                  |
|                 |             | 20/12/1969 |        | 05/07/2011 | Couldn't walk, couldn't work for long periods.                    |
|                 |             | 10/03/1964 |        | 20/09/2011 | Problems with his back                                            |
|                 |             | 19/07/1984 |        | 31/10/2011 | Knee operation. Booked outside CANAG.                             |
|                 |             | 19/03/1969 |        | 18/10/2011 | Pre-existing illness in his back.                                 |
| JAMAICA         |             | 04/04/1984 |        | 10/09/2011 | sore side                                                         |
|                 |             | 04/04/1975 |        | 21/09/2011 | Hurt his back                                                     |
|                 |             | 14/11/1959 |        | 14/06/2011 | was injured on the job                                            |
|                 |             | 12/05/1962 |        | 09/09/2011 | had a heart attack                                                |
|                 |             | 28/07/1987 |        | 27/10/2011 | loss end of finger in chain                                       |
|                 |             | 25/09/1973 |        | 11/11/2011 | face and back injured in a car accident                           |
|                 |             | 03/04/1950 |        | 28/07/2011 | eye problem - wheelchair assist                                   |
|                 |             | 29/03/1973 |        | 26/08/2011 | liaison driving worker                                            |
|                 |             | 30/01/1975 |        | 13/10/2011 | broken leg needs wheelchair assistance                            |
|                 |             | 14/09/1963 |        | 13/10/2011 | broke ankle                                                       |
|                 |             | 02/05/1961 |        | 30/06/2011 | Was admitted to psychiatric ward at hospital                      |
|                 |             | 01/02/1979 |        | 20/10/2011 | pulled a muscle in groin area                                     |
|                 |             | 31/10/1965 |        | 30/08/2011 | pulled a muscle in seizures-travelling with medical escort        |

45.
